# Supplementary material
Source: Research Square preprint supplement (doi:10.21203/rs.3.rs-9782053/v1)
Supplement: Supplementary file 1 [file 2fd676eb452b56f5601502f7.xlsx]

## Sheet: Sheet1
序号	提交答卷时间	所用时间	来源	来源详情	来自IP	1.有没有使用过以下软件?	1)您的性别	2)您的年龄	3)您的学历	4)每天使用算法推荐的社交媒体的时间	5)使用算法推荐的社交媒体多久了?	1)我经常在使用的社交媒体平台上看到与我兴趣高度契合的内容推荐	2)社交媒体平台通过算法推荐的内容能够有效满足我的观看/使用需求。	3)社交媒体平台推荐的内容与我的偏好或使用习惯相符。	1）社交媒体平台会在明显位置展示关于算法推荐规则的信息	2)社交媒体平台会明确说明其个性化算法推荐是如何运作的	3)我能在社交媒体平台上找到个性化算法推荐的依据（如浏览记录、点赞行为等）	4）社交媒体平台提供选项让我调整个性化算法推荐的设置或偏好	1)个性化算法推荐了很多我意料之外的内容	2)个性化算法的推荐经常让我感到欣喜	3)个性化算法的推荐满足了我的好奇心	1)个性化算法推荐内容降低了信息多样性	2)个性化算法推荐内容限制了我的信息获取范围	3)我获取信息的来源和内容范围比过去变得更狭窄	1)个性化算法推荐推送的信息量过大，使我难以集中注意力	2)每日接受的大量个性化推荐信息让我感到认知负担沉重	3)算法推荐的信息过多，干扰了我对重要内容的判断与筛选	4)我常常在社交媒体上被大量推荐内容淹没	1)有时看到算法推荐的内容信息会感到疲惫。	2)我对算法推荐的内容信息失去了兴趣。	3)我觉得看算法推荐的内容信息会感到很枯燥。	4)阅读算法推荐的内容信息后，我在空闲时间需要努力集中注意力
1	2025/7/9 15:53:05	310秒	手机提交	直接访问	117.151.252.32(湖北-恩施)	1	2	3	2	1	2	1	1	1	1	1	1	1	3	3	2	2	7	6	7	7	7	7	7	7	7	7
2	2025/7/9 15:53:13	487秒	微信	N/A	120.43.37.214(福建-宁德)	1	1	2	3	5	1	4	5	4	5	4	5	4	5	5	5	4	4	5	5	5	4	5	5	5	5	5
3	2025/7/9 15:53:21	278秒	手机提交	直接访问	39.154.0.238(内蒙古-呼和浩特)	4	1	3	2	2	3	5	5	4	5	4	5	4	3	2	3	5	5	6	4	5	5	4	5	4	4	5
4	2025/7/9 15:53:51	431秒	微信	N/A	125.113.65.98(浙江-金华)	3	2	2	3	1	4	6	6	6	4	4	3	4	4	3	3	6	6	6	4	3	4	4	6	7	6	5
5	2025/7/9 15:54:02	434秒	手机提交	直接访问	36.147.106.35(云南-保山)	1	2	3	2	4	4	3	5	3	3	3	4	4	4	5	4	5	4	4	3	4	4	3	5	5	5	5
6	2025/7/9 15:54:06	241秒	手机提交	直接访问	223.152.48.2(湖南-郴州)	1	1	4	2	5	3	4	4	4	4	4	4	6	6	5	2	6	6	5	4	4	4	4	5	5	4	4
7	2025/7/9 15:54:37	365秒	微信	N/A	119.181.65.54(山东-济宁)	3	1	4	4	5	4	4	5	4	5	4	5	4	4	4	3	4	5	4	5	4	6	5	4	4	4	5
8	2025/7/9 15:54:47	383秒	微信	N/A	112.38.36.250(山东-聊城)	2	2	3	2	1	3	5	5	6	4	5	4	5	5	4	5	4	4	5	5	5	5	5	5	5	5	5
9	2025/7/9 15:54:51	474秒	手机提交	直接访问	1.181.102.114(内蒙古-赤峰)	2	2	4	4	2	3	4	5	4	4	4	5	5	3	3	3	4	4	5	4	5	4	4	5	5	5	6
10	2025/7/9 15:55:32	346秒	微信	N/A	112.225.82.183(山东-青岛)	1	1	4	2	5	3	2	1	1	2	1	1	1	3	4	4	5	3	5	7	7	7	7	7	7	7	7
11	2025/7/9 15:55:37	407秒	手机提交	直接访问	1.181.102.114(内蒙古-赤峰)	1	1	1	1	2	2	4	5	4	4	5	4	3	5	5	5	5	4	6	4	4	4	4	4	4	4	3
12	2025/7/9 15:56:23	370秒	手机提交	直接访问	183.199.216.159(河北-邢台)	3	1	1	1	2	2	5	5	5	4	4	4	5	5	5	4	5	4	5	5	4	5	5	5	5	4	4
13	2025/7/9 15:56:59	402秒	微信	N/A	223.144.229.144(湖南-岳阳)	2	1	2	1	2	2	4	4	5	5	4	5	4	5	6	6	4	5	5	4	3	5	4	3	5	5	3
14	2025/7/9 15:57:08	436秒	微信	N/A	42.48.199.152(湖南-岳阳)	3	1	4	1	2	2	5	4	4	4	3	4	3	6	3	6	5	4	5	3	4	4	3	4	4	4	4
15	2025/7/9 15:57:09	322秒	微信	N/A	112.41.71.43(辽宁-沈阳)	2	2	3	2	5	2	7	6	6	7	6	6	5	4	6	6	4	3	2	6	6	6	6	5	2	2	5
16	2025/7/9 15:57:45	457秒	手机提交	直接访问	120.239.192.130(广东-清远)	3	1	2	2	3	3	3	4	3	4	4	4	5	4	4	3	4	4	5	4	4	3	4	4	4	4	4
17	2025/7/9 15:57:53	416秒	微信	N/A	119.183.23.106(山东-德州)	2	2	5	1	1	1	5	5	5	5	5	5	5	4	5	5	6	5	6	4	5	4	5	4	4	6	5
18	2025/7/9 15:58:03	317秒	微信	N/A	58.48.49.132(湖北-武汉)	3	2	3	1	3	4	5	5	6	5	5	5	5	2	3	3	5	5	6	5	5	5	5	5	6	5	4
19	2025/7/9 15:58:38	390秒	手机提交	直接访问	223.73.146.126(广东-珠海)	1	1	5	2	4	2	6	5	5	5	5	4	6	4	5	6	5	5	5	5	5	5	5	5	5	5	5
20	2025/7/9 15:58:49	397秒	手机提交	直接访问	58.48.49.132(湖北-武汉)	2	2	5	1	4	3	4	4	6	4	5	5	4	7	1	7	3	5	5	5	4	4	5	4	3	3	4
21	2025/7/9 15:59:17	424秒	微信	N/A	223.89.247.189(河南-商丘)	1	1	5	1	5	2	2	2	5	3	4	4	3	6	7	6	6	2	2	4	3	3	4	3	3	3	3
22	2025/7/9 15:59:32	226秒	手机提交	直接访问	49.5.171.194(吉林-长春)	1	2	4	4	1	4	7	7	7	7	6	7	6	2	2	1	6	6	5	7	6	7	6	7	7	7	1
23	2025/7/9 15:59:37	356秒	微信	N/A	112.47.205.218(福建-泉州)	1	1	2	1	4	2	5	6	4	6	6	6	6	3	2	3	2	2	2	6	5	5	5	5	5	5	5
24	2025/7/9 16:00:03	334秒	微信	N/A	39.184.120.27(浙江-台州)	1	1	2	2	4	3	7	7	7	7	7	7	7	1	7	1	6	6	6	7	7	7	7	7	7	7	7
25	2025/7/9 16:00:17	284秒	微信	N/A	39.66.243.81(山东-滨州)	1	1	3	2	3	3	5	5	4	5	4	4	5	3	4	4	5	6	5	5	4	5	4	5	4	5	4
26	2025/7/9 16:00:29	487秒	微信	N/A	115.150.177.90(江西-吉安)	2	2	4	4	4	2	5	4	5	4	3	5	4	6	6	6	4	3	4	4	5	5	5	3	4	4	4
27	2025/7/9 16:00:48	382秒	微信	N/A	182.151.121.248(四川-成都)	1	1	3	4	4	1	5	5	5	5	5	4	6	6	6	6	4	4	5	5	4	4	4	5	5	5	5
28	2025/7/9 16:01:02	440秒	微信	N/A	61.52.112.156(河南-郑州)	1	1	1	1	4	4	4	6	6	4	5	5	5	3	3	3	4	4	5	5	5	6	6	5	4	4	5
29	2025/7/9 16:01:15	241秒	微信	N/A	117.155.133.223(湖北-咸宁)	2	2	4	4	2	4	5	4	5	4	5	5	5	4	5	4	4	4	4	4	4	4	4	4	4	4	4
30	2025/7/9 16:01:47	284秒	微信	N/A	182.151.121.248(四川-成都)	1	1	3	2	2	3	5	5	5	4	6	5	4	2	3	4	7	5	6	5	5	4	5	6	5	5	6
31	2025/7/9 16:02:00	279秒	微信	N/A	111.31.150.155(天津-天津)	1	2	3	3	5	3	5	6	5	5	5	5	5	3	3	3	4	4	5	4	4	5	4	5	5	5	5
32	2025/7/9 16:02:45	336秒	手机提交	直接访问	183.212.131.85(江苏-盐城)	2	1	1	1	4	1	4	3	4	4	6	3	1	6	6	6	3	3	3	4	3	4	4	3	4	4	3
33	2025/7/9 16:02:59	394秒	微信	N/A	183.217.139.92(江西-宜春)	2	2	2	3	4	1	5	5	6	4	4	4	6	4	3	4	6	6	6	6	5	5	6	4	5	5	5
34	2025/7/9 16:03:11	323秒	微信	N/A	39.162.131.23(河南-郑州)	2	2	1	1	1	2	4	4	4	4	4	4	4	6	6	6	6	6	5	5	5	3	3	5	5	5	5
35	2025/7/9 16:03:56	504秒	手机提交	直接访问	60.233.17.111(山东-济南)	1	1	4	2	4	1	6	6	5	5	7	5	6	7	1	7	6	6	6	1	7	7	7	5	5	5	5
36	2025/7/9 16:04:35	357秒	微信	N/A	39.146.18.54(安徽-宣城)	2	2	1	1	5	4	5	5	6	3	4	4	3	4	4	4	4	5	4	5	3	5	5	3	3	4	4
37	2025/7/9 16:04:59	270秒	微信	N/A	106.112.42.236(河北-承德)	1	1	2	3	3	3	7	7	7	7	7	7	7	1	5	7	5	4	4	7	7	7	7	7	7	7	7
38	2025/7/9 16:05:30	290秒	微信	N/A	112.39.95.137(辽宁-沈阳)	2	1	2	3	3	4	5	4	5	7	5	2	7	4	5	5	4	5	5	4	5	6	4	5	5	5	5
39	2025/7/9 16:06:05	403秒	微信	N/A	118.78.250.128(山西-运城)	4	2	3	2	2	3	5	5	5	4	5	5	5	2	3	4	4	4	5	5	6	4	5	5	3	6	3
40	2025/7/9 16:06:05	489秒	微信	N/A	120.12.205.90(河北-张家口)	3	2	1	1	3	4	6	7	7	1	1	1	2	2	3	3	6	7	7	6	7	6	6	7	7	7	7
41	2025/7/9 16:06:25	303秒	微信	N/A	39.148.49.80(河南-周口)	4	2	3	2	1	4	6	5	5	4	5	5	5	5	4	7	4	5	5	4	6	6	5	5	5	5	5
42	2025/7/9 16:06:50	415秒	手机提交	直接访问	111.37.244.88(山东-烟台)	4	1	5	3	4	1	7	7	1	3	4	3	4	6	6	6	4	3	3	5	5	4	4	4	3	3	5
43	2025/7/9 16:06:51	485秒	手机提交	直接访问	123.52.34.210(河南-郑州)	1	2	4	3	1	2	5	5	6	3	6	6	4	4	4	4	5	4	5	6	5	5	6	4	4	4	5
44	2025/7/9 16:07:10	247秒	微信	N/A	183.162.126.215(安徽-六安)	1	1	3	3	5	4	4	4	5	4	5	5	5	7	7	7	5	4	4	4	3	4	4	5	5	4	3
45	2025/7/9 16:07:35	477秒	微信	N/A	36.132.239.223(黑龙江-双鸭山)	2	2	3	3	3	1	4	5	5	5	5	5	6	4	3	3	5	5	4	5	6	4	4	4	5	5	4
46	2025/7/9 16:07:43	325秒	微信	N/A	183.209.157.190(江苏-南京)	3	2	2	3	1	3	5	5	5	5	5	5	5	5	6	5	4	4	5	5	6	5	5	5	5	5	5
47	2025/7/9 16:07:57	503秒	手机提交	直接访问	223.107.245.204(江苏-泰州)	1	2	2	3	3	2	5	4	5	7	6	7	7	7	7	7	1	1	2	3	3	4	3	4	4	4	4
48	2025/7/9 16:08:42	497秒	微信	N/A	111.22.243.104(湖南-岳阳)	1	2	3	4	1	2	5	5	6	4	5	5	6	7	7	7	5	5	5	5	6	4	4	4	5	6	6
49	2025/7/9 16:09:23	436秒	手机提交	直接访问	39.185.105.137(浙江-宁波)	1	1	3	3	3	3	5	5	5	4	5	4	5	3	4	2	3	3	4	4	3	3	4	5	5	5	5
50	2025/7/9 16:09:45	432秒	手机提交	直接访问	111.41.195.48(黑龙江-大兴安岭)	1	1	3	3	4	2	6	5	5	5	5	6	5	7	6	7	4	6	4	5	6	6	5	4	4	6	4
51	2025/7/9 16:09:58	461秒	手机提交	直接访问	120.217.9.175(河南-郑州)	3	1	2	1	5	3	4	3	4	4	4	4	4	3	3	3	5	4	6	4	5	5	4	3	5	5	2
52	2025/7/9 16:10:53	512秒	手机提交	直接访问	182.105.127.84(江西-宜春)	1	2	4	3	2	2	6	5	5	4	4	5	5	5	5	5	4	4	5	5	4	5	4	5	5	5	5
53	2025/7/9 16:11:35	486秒	手机提交	直接访问	114.234.50.241(江苏-徐州)	1	2	3	3	2	2	4	4	4	4	3	3	4	5	5	5	5	5	5	4	4	3	3	5	5	3	3
54	2025/7/9 16:12:21	356秒	手机提交	直接访问	111.122.178.88(贵州-黔南)	3	2	3	2	4	2	5	5	4	4	4	5	4	1	3	5	3	3	3	5	3	5	5	4	4	5	5
55	2025/7/9 16:12:45	308秒	微信	N/A	36.159.218.47(安徽-芜湖)	1	1	3	2	3	1	6	5	4	4	5	5	5	5	5	6	5	4	5	5	1	6	6	5	5	5	5
56	2025/7/9 16:13:05	367秒	微信	N/A	111.38.227.5(安徽-宿州)	1	2	3	2	3	1	5	4	5	4	5	5	5	2	5	2	4	4	5	5	5	6	5	4	4	4	4
57	2025/7/9 16:13:12	338秒	微信	N/A	36.142.60.86(甘肃-兰州)	1	2	5	4	4	3	1	1	5	5	6	6	6	3	3	3	5	4	5	6	5	5	6	6	6	6	5
58	2025/7/9 16:13:50	339秒	微信	N/A	183.211.89.63(江苏-苏州)	1	1	2	3	2	3	4	4	4	3	3	3	3	5	5	5	3	3	4	3	6	2	4	3	5	3	3
59	2025/7/9 16:13:57	389秒	手机提交	直接访问	183.208.116.73(江苏-宿迁)	1	2	1	1	3	4	5	5	5	4	5	5	4	6	6	5	4	4	5	5	6	5	6	4	4	4	5
60	2025/7/9 16:14:16	226秒	微信	N/A	116.130.169.43(天津-天津)	3	2	4	3	1	1	5	5	4	4	5	5	5	2	3	4	4	4	5	5	5	4	5	5	4	5	5
61	2025/7/9 16:14:42	404秒	微信	N/A	223.88.154.108(河南-洛阳)	1	1	3	2	4	4	4	4	5	4	5	5	5	6	5	6	4	4	5	4	5	4	4	5	5	5	5
62	2025/7/9 16:15:18	398秒	微信	N/A	119.41.74.192(海南-琼海)	1	1	1	1	3	3	3	4	4	4	5	5	5	5	6	5	4	4	5	3	4	4	4	4	4	4	3
63	2025/7/9 16:15:27	410秒	微信	N/A	119.123.106.44(广东-深圳)	1	2	2	2	4	3	6	4	4	5	5	6	5	5	5	5	4	5	5	4	5	5	5	5	4	5	5
64	2025/7/9 16:16:06	257秒	微信	N/A	112.40.19.177(辽宁-营口)	2	2	3	2	5	4	5	5	4	5	5	6	5	3	3	3	5	4	5	5	4	4	5	5	5	5	5
65	2025/7/9 16:16:11	499秒	微信	N/A	183.150.83.81(浙江-衢州)	1	2	2	2	2	4	4	2	7	6	4	5	4	4	5	4	3	3	3	2	6	5	6	5	4	4	4
66	2025/7/9 16:16:29	398秒	微信	N/A	112.47.112.57(福建-泉州)	3	1	1	1	2	4	4	6	5	6	4	6	5	3	3	3	5	5	5	5	4	6	6	5	6	5	4
67	2025/7/9 16:16:51	496秒	链接	直接访问	119.118.86.239(辽宁-沈阳)	1	1	3	2	1	1	4	4	4	1	3	1	3	7	7	7	5	5	5	3	5	4	4	6	5	7	7
68	2025/7/9 16:17:00	372秒	手机提交	直接访问	117.129.33.202(北京-北京)	1	1	3	2	3	1	2	3	2	6	6	6	5	3	3	3	4	5	4	7	5	6	5	6	6	5	6
69	2025/7/9 16:17:14	236秒	微信	N/A	39.128.155.127(云南-文山)	1	2	3	3	4	3	6	4	6	6	6	6	6	3	3	3	3	3	4	7	6	5	6	5	5	5	5
70	2025/7/9 16:17:45	235秒	链接	直接访问	122.6.211.46(山东-滨州)	1	2	3	3	1	4	6	5	5	7	7	1	6	5	5	6	2	3	3	6	5	6	5	3	3	3	2
71	2025/7/9 16:17:59	503秒	微信	N/A	117.42.155.29(江西-上饶)	2	2	5	1	5	3	6	4	4	4	6	3	4	4	5	5	3	4	3	4	4	4	5	4	4	4	4
72	2025/7/9 16:18:25	259秒	微信	N/A	27.213.54.220(山东-烟台)	2	2	3	3	2	1	6	3	5	4	6	4	4	3	3	2	5	5	6	5	5	4	5	5	5	6	5
73	2025/7/9 16:18:32	409秒	微信	N/A	120.235.103.136(广东-揭阳)	1	2	3	1	3	2	5	5	4	5	4	4	5	5	5	5	4	4	5	5	6	5	6	4	5	5	5
74	2025/7/9 16:18:46	236秒	手机提交	直接访问	119.114.114.108(辽宁-鞍山)	2	2	2	1	5	1	4	5	3	4	3	2	3	5	5	5	5	5	1	4	5	4	3	3	3	4	4
75	2025/7/9 16:19:12	235秒	微信	N/A	39.183.156.38(浙江-金华)	4	2	2	2	1	4	5	5	4	5	7	5	6	4	3	3	5	6	6	5	5	5	6	5	5	5	4
76	2025/7/9 16:19:20	327秒	微信	N/A	120.228.34.129(湖南-衡阳)	2	1	3	1	3	3	4	4	3	5	3	5	1	5	4	5	3	5	3	4	4	3	3	4	4	4	3
77	2025/7/9 16:20:24	294秒	手机提交	直接访问	39.128.122.14(云南-楚雄)	1	1	3	2	2	3	6	6	6	5	7	6	6	5	5	6	1	2	3	3	2	1	2	2	2	1	3
78	2025/7/9 16:20:48	352秒	微信	N/A	110.231.153.25(河北-唐山)	3	1	4	2	2	2	7	7	7	3	2	2	2	2	1	2	5	6	6	7	7	7	6	7	6	6	7
79	2025/7/9 16:20:52	413秒	手机提交	直接访问	117.171.168.103(江西-九江)	3	1	2	2	5	3	5	6	5	5	6	4	5	6	5	4	5	4	5	5	5	6	6	4	4	5	5
80	2025/7/9 16:21:09	472秒	手机提交	直接访问	111.19.51.156(陕西-咸阳)	1	2	3	1	2	2	5	4	5	3	4	3	5	3	7	6	5	4	4	5	4	4	5	4	4	4	3
81	2025/7/9 16:21:32	386秒	微信	N/A	59.152.39.166(河南-郑州)	1	1	1	1	2	4	4	7	3	4	4	6	5	6	5	5	4	4	4	5	4	4	5	5	4	5	4
82	2025/7/9 16:21:37	483秒	微信	N/A	218.18.206.159(广东-深圳)	1	1	3	3	2	2	4	4	4	6	5	4	6	5	5	6	4	4	4	3	4	5	4	6	4	6	4
83	2025/7/9 16:21:54	302秒	微信	N/A	183.9.2.59(广东-揭阳)	3	1	3	4	2	3	6	6	7	2	3	3	3	2	4	4	6	5	5	6	7	7	6	6	4	5	6
84	2025/7/9 16:22:17	378秒	手机提交	直接访问	39.148.59.103(河南-周口)	3	1	2	1	2	1	5	5	4	5	5	5	4	4	3	3	6	5	5	4	5	4	5	5	5	6	6
85	2025/7/9 16:22:23	338秒	微信	N/A	112.7.95.186(山东-烟台)	1	1	3	2	1	1	5	4	5	5	4	5	5	2	2	2	5	7	7	5	5	4	5	6	6	6	7
86	2025/7/9 16:22:39	296秒	微信	N/A	117.143.55.112(上海-上海)	1	1	2	2	3	1	5	5	4	4	4	5	5	5	5	5	4	5	4	4	5	5	5	3	3	3	4
87	2025/7/9 16:23:03	347秒	微信	N/A	112.80.13.32(江苏-南京)	2	1	1	1	2	2	4	3	4	4	5	5	5	4	5	5	4	4	5	4	4	3	4	5	5	4	4
88	2025/7/9 16:23:08	300秒	微信	N/A	112.87.118.106(江苏-无锡)	1	1	4	4	2	3	4	5	5	6	4	5	4	5	5	5	4	4	5	4	6	5	4	3	3	6	4
89	2025/7/9 16:23:24	416秒	微信	N/A	223.11.165.28(山西-太原)	3	1	3	2	3	2	5	4	5	6	4	6	5	4	3	4	5	5	5	5	4	4	4	4	4	4	5
90	2025/7/9 16:23:48	504秒	微信	N/A	183.191.200.157(山西-太原)	1	2	5	2	1	2	5	4	5	4	5	5	5	6	4	4	3	3	4	4	4	6	5	4	6	6	3
91	2025/7/9 16:23:53	382秒	微信	N/A	223.101.161.181(辽宁-抚顺)	1	1	3	2	5	2	4	5	4	4	5	5	5	4	5	5	4	4	5	3	5	4	4	4	5	4	5
92	2025/7/9 16:24:09	376秒	微信	N/A	112.54.203.93(四川-成都)	3	2	5	1	2	2	7	7	7	6	6	7	6	7	7	7	5	4	5	6	7	6	6	6	6	7	7
93	2025/7/9 16:24:34	239秒	微信	N/A	36.142.169.155(甘肃-陇南)	1	1	4	3	1	2	5	5	5	4	5	5	5	5	5	5	4	4	4	5	4	3	5	5	5	5	4
94	2025/7/9 16:24:49	277秒	微信	N/A	117.150.191.44(湖北-黄冈)	2	2	3	2	2	3	7	6	7	2	2	1	2	2	2	2	6	6	7	6	6	6	7	6	6	6	7
95	2025/7/9 16:24:56	388秒	微信	N/A	223.98.34.33(山东-德州)	3	2	4	3	2	1	3	4	4	4	5	5	5	6	5	5	4	4	5	4	4	5	4	4	6	3	3
96	2025/7/9 16:25:19	483秒	微信	N/A	171.12.235.10(河南-驻马店)	3	2	2	4	5	2	3	3	3	5	4	6	5	7	7	7	3	3	3	5	6	6	4	2	4	3	3
97	2025/7/9 16:25:37	494秒	微信	N/A	112.40.126.224(辽宁-鞍山)	2	1	4	1	4	2	4	3	4	5	6	4	5	2	3	3	5	5	5	5	5	5	6	4	4	4	3
98	2025/7/9 16:25:44	421秒	微信	N/A	110.229.67.249(河北-保定)	2	1	3	2	3	3	5	6	5	6	5	4	6	3	4	3	2	3	3	5	6	6	6	5	3	5	5
99	2025/7/9 16:26:07	448秒	链接	直接访问	182.88.54.61(广西-南宁)	2	1	5	3	1	3	5	4	5	5	5	5	5	5	5	5	4	4	4	5	5	5	5	5	5	4	4
100	2025/7/9 16:26:42	318秒	微信	N/A	111.25.163.228(吉林-白城)	2	2	4	4	5	2	3	2	2	1	5	3	1	6	6	6	6	2	3	2	3	2	2	3	4	3	3
101	2025/7/9 16:26:54	454秒	微信	N/A	42.101.108.96(黑龙江-大庆)	2	1	4	1	3	3	1	1	1	7	7	7	7	1	7	1	6	5	6	7	7	7	7	7	7	7	7
102	2025/7/9 16:27:14	268秒	微信	N/A	112.41.111.204(辽宁-沈阳)	1	1	2	3	3	1	5	5	5	5	5	5	5	4	4	4	5	4	4	4	4	5	5	5	5	5	5
103	2025/7/9 16:27:28	399秒	手机提交	直接访问	223.90.227.76(河南-许昌)	2	1	4	3	5	2	7	7	7	7	7	7	7	2	1	1	6	7	7	7	7	7	6	7	7	6	7
104	2025/7/9 16:28:00	416秒	手机提交	直接访问	101.68.249.192(浙江-嘉兴)	4	1	5	1	4	4	5	4	4	4	4	5	5	5	6	6	3	3	3	5	4	5	5	5	4	4	4
105	2025/7/9 16:28:06	372秒	微信	N/A	125.40.64.251(河南-郑州)	1	1	3	2	4	3	3	3	3	3	4	3	2	7	7	7	2	3	2	3	3	3	3	3	3	3	3
106	2025/7/9 16:28:30	422秒	微信	N/A	111.27.188.178(吉林-长春)	1	2	3	2	4	3	3	3	6	5	5	4	4	6	5	6	3	3	3	3	4	4	4	2	3	2	2
107	2025/7/9 16:28:46	257秒	链接	直接访问	39.155.84.40(内蒙古-兴安)	1	2	3	1	1	1	4	4	4	4	4	4	4	4	6	7	3	3	3	4	4	3	4	4	3	4	4
108	2025/7/9 16:29:15	231秒	微信	N/A	111.27.29.73(吉林-延边)	1	2	2	2	3	1	2	2	1	7	6	7	7	7	1	2	6	7	6	6	7	7	7	7	6	7	5
109	2025/7/9 16:29:25	305秒	微信	N/A	110.247.202.159(河北-衡水)	1	1	5	1	3	2	4	5	4	5	4	4	5	7	3	1	3	3	3	5	5	5	5	4	4	4	5
110	2025/7/9 16:29:31	497秒	微信	N/A	117.151.21.234(湖北-武汉)	1	1	3	2	5	3	4	4	5	4	5	5	5	5	5	3	4	4	5	4	3	4	5	4	5	5	4
111	2025/7/9 16:30:52	336秒	微信	N/A	110.7.35.56(内蒙古-呼伦贝尔)	1	1	3	2	5	3	5	5	5	4	5	5	5	4	4	4	6	5	6	5	5	6	4	4	6	5	5
112	2025/7/9 16:30:58	272秒	微信	N/A	113.7.100.126(黑龙江-牡丹江)	1	1	2	4	4	4	1	3	2	5	7	6	6	7	7	7	2	2	2	2	2	1	3	3	1	3	1
113	2025/7/9 16:31:02	317秒	微信	N/A	115.57.131.3(河南-郑州)	2	2	5	2	3	4	4	5	4	3	2	4	3	5	5	5	4	5	4	4	4	3	5	3	3	3	3
114	2025/7/9 16:31:40	477秒	手机提交	直接访问	117.151.149.138(湖北-荆州)	1	1	3	3	2	4	6	7	7	4	5	5	5	2	2	4	5	7	6	4	4	6	5	5	5	4	5
115	2025/7/9 16:31:47	288秒	微信	N/A	183.216.28.182(江西-南昌)	1	1	4	4	1	2	4	3	5	5	6	1	4	7	6	7	5	6	5	3	4	4	5	5	5	5	4
116	2025/7/9 16:32:04	376秒	手机提交	直接访问	116.95.202.54(内蒙古-赤峰)	1	1	3	1	3	3	4	5	4	4	4	3	3	3	4	4	3	3	3	4	4	5	4	4	4	4	5
117	2025/7/9 16:32:25	345秒	手机提交	直接访问	39.176.155.145(江西-萍乡)	3	1	3	1	4	3	2	4	3	5	3	5	5	6	7	7	4	4	5	4	3	3	3	3	3	3	4
118	2025/7/9 16:32:34	345秒	手机提交	直接访问	183.211.135.163(江苏-无锡)	3	1	3	1	3	2	4	4	3	3	3	5	5	4	5	5	3	3	2	4	4	4	5	4	3	4	3
119	2025/7/9 16:32:50	355秒	微信	N/A	120.239.50.34(广东-茂名)	1	1	1	1	3	2	5	5	4	5	5	5	5	6	5	5	3	3	3	4	6	5	5	5	5	4	4
120	2025/7/9 16:33:18	313秒	微信	N/A	125.92.146.82(广东-中山)	2	1	3	2	3	3	1	2	2	7	7	7	7	1	7	1	7	7	6	7	7	7	7	7	7	7	7
121	2025/7/9 16:33:35	357秒	手机提交	直接访问	117.133.90.106(北京-北京)	3	2	5	4	3	4	5	3	1	3	5	3	4	4	4	4	4	3	2	3	2	4	3	3	3	3	3
122	2025/7/9 16:34:04	260秒	微信	N/A	27.30.121.22(湖北-恩施)	3	1	3	4	4	4	7	7	7	7	6	6	7	2	3	3	7	7	6	6	7	7	6	7	6	7	7
123	2025/7/9 16:34:08	240秒	微信	N/A	117.181.243.210(广西-梧州)	1	2	2	2	3	4	7	6	7	7	6	7	7	5	2	2	7	7	6	6	7	6	7	5	7	7	6
124	2025/7/9 16:34:21	484秒	手机提交	直接访问	112.39.90.219(辽宁-沈阳)	1	1	4	1	3	2	3	4	7	4	5	5	5	5	5	5	4	3	3	5	5	5	5	3	4	3	3
125	2025/7/9 16:34:56	440秒	微信	N/A	112.36.0.31(山东-滨州)	1	2	3	4	1	2	4	5	5	5	5	5	5	4	4	3	5	5	5	5	4	5	4	6	5	4	5
126	2025/7/9 16:34:57	368秒	微信	N/A	117.165.204.122(江西-吉安)	2	2	3	4	4	3	7	6	6	6	6	6	7	3	3	4	5	5	5	7	6	6	6	4	5	4	6
127	2025/7/9 16:35:16	459秒	手机提交	直接访问	36.161.247.74(安徽-芜湖)	2	1	2	1	3	4	3	3	2	5	5	5	5	7	7	7	5	4	4	5	6	5	4	6	5	5	5
128	2025/7/9 16:35:41	480秒	微信	N/A	223.74.242.170(广东-揭阳)	1	1	3	1	5	1	5	4	6	5	5	5	5	5	6	6	5	3	1	4	4	4	5	5	5	5	4
129	2025/7/9 16:36:03	380秒	微信	N/A	121.16.210.208(河北-沧州)	1	1	4	1	1	1	5	5	5	4	5	5	5	5	6	6	4	4	5	6	5	6	6	5	5	5	4
130	2025/7/9 16:36:30	407秒	微信	N/A	101.64.209.198(浙江-湖州)	1	1	3	3	3	3	3	4	3	4	5	5	5	4	3	4	4	4	5	3	4	4	3	4	4	4	5
131	2025/7/9 16:36:42	495秒	微信	N/A	58.51.24.154(湖北-襄阳)	1	1	2	3	1	2	1	3	2	7	7	7	7	3	3	2	7	6	6	7	7	7	7	6	6	7	7
132	2025/7/9 16:36:59	278秒	手机提交	直接访问	111.27.8.248(吉林-长春)	1	1	5	1	3	4	5	6	5	4	5	4	5	6	2	2	5	6	6	6	5	5	6	5	4	5	4
133	2025/7/9 16:37:20	229秒	微信	N/A	112.12.159.141(浙江-温州)	2	1	5	2	4	2	5	5	5	6	5	6	6	3	2	2	6	5	6	6	5	6	6	4	5	5	5
134	2025/7/9 16:37:28	236秒	手机提交	直接访问	117.155.107.166(湖北-荆门)	1	2	4	4	3	4	5	6	4	6	5	4	5	6	5	6	6	5	5	5	6	4	5	6	5	5	5
135	2025/7/9 16:37:46	339秒	手机提交	直接访问	120.217.225.118(河南-郑州)	2	2	4	2	3	2	6	5	5	5	5	6	6	4	4	4	4	5	4	5	5	6	5	6	5	5	2
136	2025/7/9 16:38:14	319秒	手机提交	直接访问	183.251.99.67(福建-厦门)	1	2	4	2	1	1	5	5	5	3	3	5	5	3	3	4	5	3	5	6	5	6	6	5	5	5	5
137	2025/7/9 16:38:21	344秒	微信	N/A	42.243.251.203(云南-德宏)	4	2	1	1	4	3	6	3	6	5	6	6	6	5	6	6	5	5	4	6	5	6	6	5	5	5	4
138	2025/7/9 16:38:33	378秒	微信	N/A	39.162.245.134(河南-平顶山)	1	1	1	1	5	3	5	5	5	6	7	5	5	3	3	4	4	4	5	5	5	5	5	4	5	5	5
139	2025/7/9 16:39:17	416秒	微信	N/A	125.123.222.76(浙江-嘉兴)	3	1	3	1	4	2	1	1	2	5	5	6	5	1	1	1	3	3	3	7	7	7	7	7	7	7	7
140	2025/7/9 16:40:02	499秒	微信	N/A	120.228.250.19(湖南-湘潭)	1	2	2	2	3	3	7	7	7	3	3	3	2	2	4	3	6	5	5	6	6	6	6	6	7	6	6
141	2025/7/9 16:40:21	476秒	微信	N/A	36.161.160.91(安徽-池州)	2	1	4	1	1	3	7	7	6	3	3	2	3	2	3	2	5	6	5	5	5	5	5	6	7	7	6
142	2025/7/9 16:40:37	286秒	微信	N/A	36.161.160.91(安徽-池州)	1	2	1	1	3	2	5	4	4	5	4	5	4	4	3	4	3	3	3	4	3	4	5	5	4	5	4
143	2025/7/9 16:40:55	294秒	微信	N/A	222.91.198.187(陕西-西安)	1	1	5	4	3	2	4	5	4	3	3	3	4	4	5	4	3	3	3	1	3	6	2	3	4	4	4
144	2025/7/9 16:41:06	303秒	微信	N/A	183.159.70.210(浙江-杭州)	2	2	3	3	3	2	6	5	5	5	4	5	6	4	3	4	5	4	5	5	6	5	5	4	5	4	4
145	2025/7/9 16:41:23	357秒	微信	N/A	221.11.95.5(陕西-咸阳)	2	1	3	4	3	2	6	5	5	5	5	6	7	5	4	4	3	2	3	6	5	5	6	5	4	4	4
146	2025/7/9 16:41:40	458秒	微信	N/A	119.191.38.191(山东-潍坊)	1	2	3	1	3	4	5	5	5	3	5	3	4	6	7	7	5	4	3	4	5	5	5	4	5	5	4
147	2025/7/9 16:41:55	264秒	微信	N/A	112.37.200.33(山东-滨州)	2	2	3	2	3	3	5	5	5	4	5	5	5	2	2	3	4	5	5	4	6	5	4	5	5	5	4
148	2025/7/9 16:42:41	395秒	微信	N/A	117.189.4.192(贵州-贵阳)	1	1	3	1	3	3	6	5	6	6	4	6	5	3	3	3	5	5	5	5	6	5	5	5	6	5	5
149	2025/7/9 16:42:53	411秒	手机提交	直接访问	223.91.73.250(河南-南阳)	1	2	4	4	3	3	1	1	1	7	7	7	7	1	7	1	5	5	6	7	7	7	7	7	7	7	7
150	2025/7/9 16:43:19	494秒	微信	N/A	39.128.75.0(云南-昭通)	1	1	2	2	3	4	5	4	6	5	5	5	5	2	3	2	6	3	5	6	5	5	4	6	5	6	6
151	2025/7/9 16:43:26	511秒	微信	N/A	114.217.85.239(江苏-苏州)	3	1	4	4	5	3	4	5	5	5	4	5	6	3	3	3	4	4	5	3	5	4	5	5	5	3	4
152	2025/7/9 16:43:38	356秒	微信	N/A	111.76.207.133(江西-南昌)	2	1	5	2	3	1	4	4	4	3	4	2	3	6	2	5	5	4	5	4	4	4	4	2	3	6	5
153	2025/7/9 16:44:13	236秒	微信	N/A	123.244.2.10(辽宁-铁岭)	1	2	3	2	3	3	6	6	7	2	2	3	2	2	2	3	6	6	5	6	6	5	6	2	5	5	6
154	2025/7/9 16:44:25	344秒	微信	N/A	39.130.32.117(云南-曲靖)	1	1	4	1	3	3	4	3	4	5	4	4	5	5	5	5	4	4	5	5	4	4	5	4	3	3	3
155	2025/7/9 16:44:57	325秒	微信	N/A	36.143.6.11(河北-张家口)	2	1	5	3	3	2	4	4	3	4	5	5	6	3	4	2	5	5	5	4	4	4	3	5	5	5	5
156	2025/7/9 16:45:20	466秒	手机提交	直接访问	122.194.228.86(江苏-连云港)	1	2	3	4	3	2	6	5	2	5	4	5	5	5	6	6	5	4	5	5	5	5	5	4	4	4	5
157	2025/7/9 16:45:42	414秒	微信	N/A	113.214.227.241(浙江-杭州)	1	1	2	1	2	3	5	5	5	4	5	5	5	4	4	3	3	3	3	5	4	4	5	3	4	3	2
158	2025/7/9 16:45:51	444秒	微信	N/A	118.125.250.51(四川-眉山)	1	2	1	1	3	2	5	5	5	5	5	6	5	4	4	3	6	5	6	5	5	6	4	6	6	6	5
159	2025/7/9 16:46:05	441秒	微信	N/A	125.79.119.230(福建-龙岩)	4	1	3	2	5	3	6	6	6	6	6	6	6	2	2	2	6	5	5	6	6	6	6	6	6	5	2
160	2025/7/9 16:46:28	495秒	微信	N/A	183.225.147.121(云南-文山)	3	1	5	4	3	3	4	5	3	4	3	3	3	7	7	6	4	2	4	3	4	4	4	3	4	3	3
161	2025/7/9 16:46:50	300秒	微信	N/A	101.75.101.253(河北-唐山)	1	1	3	4	3	2	4	6	5	4	5	4	5	3	4	3	6	5	5	4	4	5	6	4	5	4	4
162	2025/7/9 16:47:12	316秒	微信	N/A	116.1.70.85(广西-桂林)	4	2	3	1	3	1	6	1	1	1	1	6	6	7	7	7	2	3	2	2	3	3	3	3	3	2	3
163	2025/7/9 16:47:20	354秒	微信	N/A	113.138.119.231(陕西-渭南)	1	2	3	3	3	3	5	6	6	5	5	4	4	4	3	3	4	4	5	6	4	4	6	4	6	4	4
164	2025/7/9 16:47:38	299秒	微信	N/A	39.149.11.171(河南-郑州)	1	2	4	2	4	1	6	5	5	6	5	6	5	3	3	3	5	4	5	6	5	6	4	5	5	5	5
165	2025/7/9 16:48:08	323秒	微信	N/A	124.131.240.61(山东-聊城)	2	1	3	2	3	1	5	5	4	4	5	5	5	5	5	5	5	5	5	4	4	5	5	5	5	5	5
166	2025/7/9 16:48:13	438秒	手机提交	直接访问	60.233.16.114(山东-济南)	2	2	2	3	3	1	5	6	5	4	5	5	5	3	3	5	3	3	4	6	5	5	4	3	5	4	4
167	2025/7/9 16:48:25	497秒	手机提交	直接访问	117.179.249.159(黑龙江-哈尔滨)	1	1	3	2	3	4	5	6	5	5	5	4	5	4	4	4	4	4	5	5	5	6	5	6	5	6	6
168	2025/7/9 16:48:58	445秒	微信	N/A	116.26.185.107(广东-汕头)	1	2	2	2	3	2	3	3	2	2	2	2	3	6	6	7	3	2	2	2	2	3	2	6	6	3	5
169	2025/7/9 16:49:10	233秒	微信	N/A	36.148.122.54(湖南-张家界)	1	1	4	1	4	1	5	4	4	4	5	5	5	3	4	4	5	6	6	4	4	4	5	5	5	4	5
170	2025/7/9 16:49:45	500秒	微信	N/A	120.230.150.222(广东-江门)	1	2	3	2	2	2	5	5	5	4	5	5	5	3	4	3	4	4	5	6	5	5	6	4	5	4	5
171	2025/7/9 16:49:56	339秒	微信	N/A	120.242.215.24(安徽-安庆)	4	1	3	2	5	3	4	4	5	2	4	3	3	4	4	4	5	5	5	3	3	5	4	4	5	4	5
172	2025/7/9 16:50:31	281秒	微信	N/A	171.92.220.133(四川-眉山)	1	1	3	3	3	1	5	4	4	5	5	4	3	6	5	6	5	6	5	5	4	4	4	6	5	5	5
173	2025/7/9 16:50:39	407秒	微信	N/A	39.162.251.121(河南-平顶山)	3	2	5	4	4	1	5	5	5	4	5	5	5	5	4	5	4	4	5	5	5	4	5	4	4	5	5
174	2025/7/9 16:50:45	431秒	手机提交	直接访问	36.132.238.52(黑龙江-双鸭山)	3	1	4	3	4	3	5	4	5	5	5	4	4	3	3	4	5	5	5	4	5	5	5	5	4	5	5
175	2025/7/9 16:51:16	358秒	手机提交	直接访问	120.226.201.95(湖南-邵阳)	1	1	1	1	2	3	5	5	5	6	3	1	3	7	7	7	3	3	4	5	4	5	6	6	5	4	5
176	2025/7/9 16:51:25	428秒	手机提交	直接访问	36.143.68.59(河北-保定)	2	1	3	3	3	2	5	4	6	4	4	4	4	5	5	5	3	2	3	4	4	5	4	4	5	5	5
177	2025/7/9 16:51:32	426秒	微信	N/A	119.2.235.27(广东-广州)	1	2	2	2	4	3	4	5	4	5	5	4	5	5	5	5	5	5	5	5	5	5	5	5	4	5	4
178	2025/7/9 16:52:17	308秒	微信	N/A	117.173.16.127(四川-雅安)	1	1	4	4	3	1	3	2	3	3	3	2	3	4	3	3	5	5	6	5	5	7	6	5	6	5	6
179	2025/7/9 16:52:22	257秒	微信	N/A	112.0.87.108(江苏-镇江)	2	1	2	2	3	2	4	3	4	1	4	5	5	3	4	3	4	5	4	3	4	3	4	4	3	4	4
180	2025/7/9 16:53:02	508秒	手机提交	直接访问	112.0.87.108(江苏-镇江)	2	2	3	2	4	2	5	5	7	4	4	5	5	2	2	2	6	6	6	5	6	5	5	7	6	7	7
181	2025/7/9 16:53:04	340秒	微信	N/A	39.128.186.120(云南-普洱)	3	2	3	2	3	4	5	5	5	4	5	5	5	4	4	5	4	4	5	5	6	5	5	5	5	4	5
182	2025/7/9 16:53:07	224秒	微信	N/A	183.210.64.229(江苏-扬州)	3	1	3	3	2	3	6	6	6	3	2	3	2	4	4	4	5	3	3	6	6	4	4	6	6	5	5
183	2025/7/9 16:53:46	360秒	微信	N/A	220.112.211.151(贵州-贵阳)	3	1	2	2	3	4	5	5	5	3	5	3	3	6	6	5	6	5	6	5	5	5	5	6	6	6	5
184	2025/7/9 16:53:49	341秒	微信	N/A	223.198.195.55(海南-临高)	2	1	2	3	4	3	4	4	5	6	6	4	5	4	4	4	2	6	5	4	4	5	4	4	6	4	5
185	2025/7/9 16:53:57	365秒	微信	N/A	220.205.244.247(安徽-合肥)	3	2	2	3	3	3	3	5	4	3	4	5	3	7	1	7	3	4	4	4	3	4	4	4	4	4	4
186	2025/7/9 16:54:34	403秒	微信	N/A	119.166.199.75(山东-青岛)	1	2	3	3	2	1	5	5	5	4	5	3	5	4	4	3	3	4	2	4	4	4	5	5	4	5	6
187	2025/7/9 16:54:34	356秒	微信	N/A	111.16.186.60(山东-东营)	1	1	4	2	3	3	4	3	3	1	3	4	3	5	6	6	3	3	3	4	4	3	3	4	3	4	3
188	2025/7/9 16:54:45	294秒	手机提交	直接访问	112.1.111.109(江苏-常州)	2	2	5	1	3	3	2	3	5	6	5	6	6	1	7	6	6	5	6	6	6	6	6	5	5	5	4
189	2025/7/9 16:55:19	363秒	微信	N/A	111.49.227.107(宁夏-吴忠)	2	2	4	2	4	2	6	5	3	4	5	6	6	5	6	5	4	3	3	4	4	5	5	5	4	5	5
190	2025/7/9 16:55:26	225秒	微信	N/A	58.100.113.188(浙江-杭州)	3	1	3	3	4	3	3	4	3	3	3	4	4	7	7	7	3	3	4	4	3	4	3	4	4	4	4
191	2025/7/9 16:55:34	478秒	微信	N/A	123.174.83.251(山西-运城)	1	1	4	1	5	2	6	6	6	1	1	1	7	3	2	3	6	5	5	5	5	6	5	6	6	5	5
192	2025/7/9 16:56:04	374秒	微信	N/A	123.174.83.251(山西-运城)	2	2	5	4	3	4	5	4	5	4	5	5	5	3	3	4	4	3	3	6	5	4	5	5	4	6	5
193	2025/7/9 16:56:12	393秒	手机提交	直接访问	39.177.161.179(江西-赣州)	1	2	4	1	4	1	4	4	5	4	5	5	5	6	6	6	3	4	3	4	4	5	4	5	4	4	4
194	2025/7/9 16:56:20	291秒	手机提交	直接访问	223.65.40.127(江苏-南京)	1	1	2	3	4	3	3	3	4	5	6	6	6	6	6	6	3	2	2	2	3	3	2	3	2	3	2
195	2025/7/9 16:56:49	311秒	微信	N/A	223.86.93.216(四川-广元)	2	2	3	3	3	1	6	6	6	5	4	4	5	6	5	5	3	3	2	4	4	4	4	5	5	5	5
196	2025/7/9 16:56:58	279秒	微信	N/A	111.25.250.81(吉林-吉林)	3	1	4	1	4	4	5	5	5	3	3	3	3	5	3	4	5	5	5	5	5	5	5	5	5	5	6
197	2025/7/9 16:57:06	481秒	微信	N/A	124.236.136.62(河北-石家庄)	1	1	5	1	4	3	6	4	6	5	5	4	5	5	5	5	3	4	4	6	4	6	6	5	6	1	4
198	2025/7/9 16:57:36	306秒	微信	N/A	120.228.181.115(湖南-怀化)	2	1	5	3	3	3	7	7	7	7	7	7	7	2	2	2	5	6	6	7	7	7	7	6	6	5	6
199	2025/7/9 16:57:43	379秒	微信	N/A	113.132.61.102(陕西-西安)	1	2	4	2	3	1	5	4	4	4	5	5	5	5	5	5	5	5	5	5	4	5	4	4	4	4	5
200	2025/7/9 16:57:51	324秒	微信	N/A	113.201.137.127(陕西-西安)	1	1	5	4	4	3	4	4	5	3	5	3	4	5	5	4	5	5	5	3	4	4	5	4	4	5	4
201	2025/7/9 16:58:21	463秒	手机提交	直接访问	223.198.72.85(海南-定安)	1	2	4	4	3	2	4	5	6	5	5	5	5	3	3	5	5	5	5	5	5	5	5	5	6	4	5
202	2025/7/9 16:58:28	314秒	手机提交	直接访问	111.113.208.142(宁夏-银川)	3	2	2	3	4	2	4	4	5	4	4	5	5	4	4	4	3	4	3	5	5	5	5	5	4	4	4
203	2025/7/9 16:58:46	422秒	微信	N/A	117.153.40.159(湖北-宜昌)	1	1	2	3	4	2	5	5	5	4	5	5	5	6	5	5	3	4	4	5	5	5	5	5	6	5	5
204	2025/7/9 16:59:17	258秒	微信	N/A	124.239.57.45(河北-承德)	1	2	2	2	5	4	5	5	5	4	5	5	5	3	3	4	5	6	6	6	5	6	5	5	5	5	5
205	2025/7/9 16:59:31	492秒	手机提交	直接访问	120.230.224.7(广东-阳江)	3	1	4	4	3	4	5	5	4	4	5	5	5	3	4	5	3	5	3	5	6	5	5	5	6	3	3
206	2025/7/9 16:59:35	490秒	微信	N/A	120.208.249.97(山西-朔州)	2	2	5	1	3	1	4	5	4	4	5	5	5	5	5	5	3	4	4	5	3	3	4	4	5	4	4
207	2025/7/9 17:00:07	289秒	微信	N/A	117.170.240.245(江西-萍乡)	1	1	3	2	3	2	2	3	3	6	5	5	5	5	5	5	3	3	2	3	3	3	2	5	5	1	4
208	2025/7/9 17:00:16	499秒	微信	N/A	120.235.139.46(广东-惠州)	1	1	4	1	3	2	6	5	5	2	3	2	1	5	5	5	6	6	6	5	5	6	5	5	5	5	5
209	2025/7/9 17:00:24	328秒	微信	N/A	223.85.29.94(四川-乐山)	1	1	5	4	4	3	4	3	3	5	4	5	5	4	5	5	3	4	4	3	4	4	3	6	6	6	6
210	2025/7/9 17:00:52	442秒	微信	N/A	117.152.101.57(湖北-仙桃)	1	1	3	3	4	2	3	3	4	5	4	3	5	6	6	3	3	4	3	3	3	3	3	3	3	4	3
211	2025/7/9 17:01:02	249秒	链接	直接访问	14.212.41.180(广东-佛山)	4	1	3	2	4	2	3	4	3	3	4	4	2	5	5	5	3	3	4	4	4	4	4	3	3	4	3
212	2025/7/9 17:01:11	374秒	微信	N/A	221.237.3.15(四川-成都)	1	2	2	2	3	3	3	4	3	5	1	6	5	5	6	5	2	4	2	4	3	3	3	4	4	4	4
213	2025/7/9 17:01:46	466秒	手机提交	直接访问	39.187.118.225(浙江-宁波)	1	1	3	1	3	2	5	3	5	5	3	1	2	4	5	6	5	5	4	5	4	4	5	5	6	5	6
214	2025/7/9 17:01:47	318秒	手机提交	直接访问	180.139.205.18(广西-南宁)	1	1	3	3	4	4	4	4	4	4	4	4	4	4	6	4	4	5	3	4	4	4	4	6	7	7	7
215	2025/7/9 17:02:35	354秒	微信	N/A	39.162.249.195(河南-平顶山)	2	1	3	2	3	2	5	4	5	2	3	3	1	5	6	5	5	5	5	4	5	6	4	6	6	5	6
216	2025/7/9 17:02:43	324秒	微信	N/A	111.9.111.130(四川-绵阳)	1	1	1	1	3	1	4	4	4	6	5	5	5	4	3	5	4	4	4	4	4	5	4	5	6	3	5
217	2025/7/9 17:03:20	438秒	手机提交	直接访问	27.227.73.225(甘肃-甘南)	1	1	2	3	4	2	5	5	5	5	6	5	4	3	4	4	6	5	6	6	6	6	5	5	5	4	5
218	2025/7/9 17:03:25	393秒	微信	N/A	111.25.0.6(吉林-长春)	1	2	4	3	3	4	4	4	5	4	1	5	4	6	6	6	5	3	3	4	5	4	5	6	2	4	4
219	2025/7/9 17:03:32	496秒	微信	N/A	111.49.33.178(宁夏-银川)	1	2	2	3	4	3	5	4	4	5	4	4	4	5	5	6	6	5	6	5	4	4	4	6	5	6	5
220	2025/7/9 17:04:10	453秒	微信	N/A	117.188.127.161(贵州-黔东南)	3	2	3	2	3	3	3	4	4	5	4	2	5	4	3	4	3	3	4	4	5	4	4	4	4	4	3
221	2025/7/9 17:04:14	273秒	手机提交	直接访问	222.213.33.197(四川-宜宾)	1	2	4	2	3	4	3	4	3	3	4	2	4	4	4	4	3	4	3	3	4	4	2	3	4	3	3
222	2025/7/9 17:04:17	308秒	微信	N/A	36.142.38.73(甘肃-兰州)	3	1	2	1	3	3	7	5	6	5	7	6	6	6	5	5	3	3	2	2	2	2	2	2	1	3	2
223	2025/7/9 17:04:55	359秒	微信	N/A	116.26.161.225(广东-汕头)	1	1	4	1	3	3	5	4	5	5	5	5	6	5	4	4	4	4	3	5	5	5	6	3	6	2	3
224	2025/7/9 17:04:58	245秒	微信	N/A	27.201.150.55(山东-泰安)	3	2	3	3	4	2	3	5	4	3	4	3	4	5	5	4	3	5	6	4	4	4	4	5	5	4	5
225	2025/7/9 17:05:10	253秒	手机提交	直接访问	60.200.32.143(江西-南昌)	3	1	3	3	3	2	5	4	4	5	5	6	6	3	4	3	3	4	4	5	5	5	4	3	3	2	3
226	2025/7/9 17:05:41	435秒	手机提交	直接访问	117.71.202.220(安徽-六安)	4	1	3	4	4	4	6	6	6	6	5	6	6	3	4	4	5	6	6	6	6	3	6	5	6	5	5
227	2025/7/9 17:05:44	385秒	链接	直接访问	111.18.175.10(陕西-延安)	2	2	4	3	5	1	6	5	5	4	3	3	4	4	4	3	5	5	5	4	4	5	5	4	5	5	6
228	2025/7/9 17:05:55	292秒	微信	N/A	36.161.88.247(安徽-黄山)	2	1	3	3	4	4	5	4	5	4	3	3	2	4	4	3	5	4	5	5	5	5	4	5	5	2	2
229	2025/7/9 17:06:27	457秒	手机提交	直接访问	120.235.213.104(广东-揭阳)	3	1	3	3	3	3	5	6	6	7	6	6	5	4	3	4	4	5	5	5	5	5	5	5	5	5	4
230	2025/7/9 17:06:33	228秒	手机提交	直接访问	120.216.130.226(河南-济源)	1	1	3	4	5	3	5	6	5	6	6	5	6	6	3	6	4	3	3	5	5	4	4	5	4	4	5
231	2025/7/9 17:07:14	310秒	微信	N/A	183.199.82.24(河北-唐山)	1	2	2	3	4	2	5	5	6	5	6	5	5	3	3	3	4	4	3	5	4	4	4	5	3	3	4
232	2025/7/9 17:07:18	398秒	微信	N/A	117.151.243.62(湖北-恩施)	1	1	5	3	3	2	3	6	3	4	5	5	5	5	4	5	5	4	5	4	5	5	5	4	3	4	4
233	2025/7/9 17:07:59	501秒	微信	N/A	117.154.145.157(湖北-襄阳)	3	1	4	3	3	1	5	5	6	6	6	6	6	3	4	4	7	5	6	7	5	5	7	5	5	5	5
234	2025/7/9 17:08:12	495秒	微信	N/A	36.142.174.172(甘肃-临夏)	1	2	2	1	4	2	5	6	5	2	3	2	3	7	6	6	5	5	5	5	5	5	6	3	4	4	4
235	2025/7/9 17:08:15	424秒	微信	N/A	36.161.48.231(安徽-铜陵)	4	1	4	3	3	2	6	5	5	4	5	5	5	5	4	5	4	5	5	3	3	4	5	5	5	4	5
236	2025/7/9 17:08:44	273秒	微信	N/A	60.164.59.104(甘肃-张掖)	1	2	3	3	3	2	5	5	4	4	5	5	5	1	1	1	7	7	7	4	5	5	5	7	7	7	7
237	2025/7/9 17:08:58	480秒	微信	N/A	111.41.113.147(黑龙江-绥化)	2	1	4	2	3	3	4	5	4	4	5	5	5	3	3	4	4	3	3	4	4	4	5	5	5	6	6
238	2025/7/9 17:09:30	496秒	手机提交	直接访问	120.82.225.244(广东-佛山)	2	1	3	2	4	4	6	6	7	3	3	3	3	1	1	2	5	5	5	6	7	6	6	1	7	7	7
239	2025/7/9 17:10:01	400秒	手机提交	直接访问	27.151.210.228(福建-泉州)	1	1	1	1	3	3	5	5	5	4	2	3	3	3	3	3	3	3	3	4	5	5	5	5	5	5	5
240	2025/7/9 17:10:23	227秒	微信	N/A	111.18.178.127(陕西-汉中)	1	1	3	2	4	2	6	6	6	6	5	4	6	3	4	4	6	3	6	5	6	6	4	6	5	6	5
241	2025/7/9 17:10:31	293秒	链接	直接访问	111.31.173.192(天津-天津)	2	2	3	2	3	3	5	5	5	5	4	4	5	4	5	5	5	5	4	6	5	5	5	5	5	6	4
242	2025/7/9 17:10:46	353秒	微信	N/A	117.144.69.186(上海-上海)	2	2	1	1	3	2	3	4	4	3	4	4	4	5	4	4	3	3	3	5	6	6	6	4	4	3	4
243	2025/7/9 17:11:08	402秒	微信	N/A	120.243.65.196(安徽-亳州)	1	1	3	2	3	2	5	5	5	4	5	5	5	4	5	5	3	4	4	5	4	5	5	5	5	5	4
244	2025/7/9 17:11:21	254秒	手机提交	直接访问	106.42.167.162(河南-商丘)	1	1	2	1	3	4	5	5	6	5	5	6	4	5	3	3	5	4	5	4	5	5	4	5	5	5	4
245	2025/7/9 17:11:32	423秒	手机提交	直接访问	221.206.202.245(黑龙江-牡丹江)	1	1	1	1	3	3	3	4	3	3	3	4	3	5	3	3	3	3	4	3	4	4	4	3	3	3	3
246	2025/7/9 17:11:54	415秒	微信	N/A	39.144.46.16(上海-上海)	2	2	3	3	3	4	7	7	6	7	7	7	6	6	6	6	3	4	3	7	7	6	7	6	6	5	4
247	2025/7/9 17:12:06	296秒	手机提交	直接访问	182.51.86.247(河北-廊坊)	2	2	1	1	4	2	3	3	4	2	3	3	2	5	4	5	4	4	3	3	4	3	3	6	6	6	6
248	2025/7/9 17:12:45	292秒	微信	N/A	36.161.239.175(安徽-合肥)	1	2	2	3	3	1	4	4	4	2	3	3	3	6	6	7	5	5	4	4	4	4	4	4	4	4	4
249	2025/7/9 17:12:51	489秒	微信	N/A	39.172.185.65(浙江-丽水)	4	1	3	1	4	4	4	4	4	4	5	5	5	5	4	5	3	4	4	4	4	4	5	5	3	5	3
250	2025/7/9 17:13:03	381秒	微信	N/A	223.90.34.86(河南-焦作)	2	2	2	1	5	1	5	4	5	4	4	3	2	5	4	5	5	5	4	6	5	5	5	4	5	5	5
251	2025/7/9 17:13:31	504秒	手机提交	直接访问	223.90.34.86(河南-焦作)	2	2	2	2	4	1	6	5	7	2	3	4	4	4	3	4	6	6	6	7	6	5	6	5	5	6	6
252	2025/7/9 17:13:39	482秒	微信	N/A	36.163.133.61(北京-北京)	1	1	1	1	4	3	5	4	6	5	4	5	3	5	5	4	4	3	3	4	5	4	4	5	5	5	4
253	2025/7/9 17:13:58	305秒	手机提交	直接访问	112.22.78.116(江苏-无锡)	3	1	2	1	4	4	5	5	5	5	5	5	4	4	3	5	2	5	7	6	5	5	6	5	5	6	5
254	2025/7/9 17:14:17	294秒	手机提交	直接访问	111.41.232.9(黑龙江-大庆)	1	2	4	3	3	1	5	5	4	6	6	4	6	4	2	2	5	6	5	4	4	5	5	5	5	4	4
255	2025/7/9 17:14:27	505秒	微信	N/A	120.242.69.154(安徽-芜湖)	1	1	2	1	4	4	1	1	1	7	7	7	7	1	1	3	6	6	7	7	7	7	6	7	7	7	7
256	2025/7/9 17:14:44	473秒	微信	N/A	223.74.193.234(广东-惠州)	1	1	3	1	4	2	4	4	4	5	4	3	5	4	4	3	6	2	2	3	4	4	5	3	6	5	2
257	2025/7/9 17:15:06	481秒	微信	N/A	116.95.240.199(内蒙古-乌海)	3	2	4	1	4	2	5	5	5	4	5	5	5	4	3	3	6	6	6	5	5	5	5	6	4	5	5
258	2025/7/9 17:15:30	375秒	微信	N/A	111.25.10.118(吉林-长春)	1	1	4	3	5	2	4	5	4	5	4	4	4	3	3	5	5	6	5	4	4	4	5	4	5	5	4
259	2025/7/9 17:16:12	417秒	手机提交	直接访问	39.154.67.249(内蒙古-乌海)	1	1	5	2	3	4	6	7	7	3	3	3	3	1	1	2	3	2	4	6	7	7	6	7	6	7	6
260	2025/7/9 17:16:17	397秒	手机提交	直接访问	14.204.161.5(云南-曲靖)	1	1	2	3	4	1	4	3	3	3	4	3	3	2	4	6	2	3	3	6	2	1	3	2	6	2	2
261	2025/7/9 17:16:49	273秒	微信	N/A	123.138.178.32(陕西-延安)	3	1	2	2	3	1	5	6	6	4	5	5	5	5	5	4	4	5	5	6	5	5	6	5	5	6	5
262	2025/7/9 17:17:07	359秒	手机提交	直接访问	120.239.189.184(广东-清远)	1	1	1	1	4	1	4	6	6	5	5	6	4	5	5	4	6	5	5	5	6	5	5	4	5	5	4
263	2025/7/9 17:17:34	479秒	微信	N/A	27.187.227.114(河北-保定)	1	2	3	3	4	1	4	6	4	3	2	3	3	4	3	3	5	6	5	4	5	5	5	6	5	5	5
264	2025/7/9 17:17:43	401秒	微信	N/A	183.202.90.139(山西-大同)	1	1	3	2	4	1	4	5	4	4	4	6	3	4	2	2	5	5	6	4	5	4	4	5	6	5	5
265	2025/7/9 17:17:52	428秒	微信	N/A	119.39.147.244(湖南-湘潭)	4	1	4	1	4	3	4	3	4	3	3	3	4	5	5	4	3	4	3	4	3	3	3	5	5	6	4
266	2025/7/9 17:18:19	248秒	微信	N/A	182.51.86.14(河北-廊坊)	2	1	2	2	4	4	4	5	4	4	5	5	5	4	4	4	3	4	3	4	5	4	5	4	4	4	3
267	2025/7/9 17:18:29	321秒	手机提交	直接访问	120.225.98.208(山东-临沂)	3	1	4	1	4	2	3	2	3	5	5	6	5	7	7	6	3	3	3	3	2	3	3	3	2	4	2
268	2025/7/9 17:18:37	448秒	微信	N/A	182.203.101.243(辽宁-营口)	4	1	4	3	3	3	3	7	3	4	5	4	4	4	5	4	5	6	5	5	4	4	4	5	4	4	4
269	2025/7/9 17:19:04	410秒	手机提交	直接访问	114.101.18.155(安徽-阜阳)	3	2	2	2	3	3	5	1	5	5	5	5	5	6	6	6	3	3	3	4	3	4	4	3	4	4	3
270	2025/7/9 17:19:22	485秒	手机提交	直接访问	120.235.158.34(广东-广州)	1	1	2	2	5	2	5	5	5	4	5	5	5	5	5	4	6	5	5	5	5	5	5	5	5	6	6
271	2025/7/9 17:19:48	443秒	手机提交	直接访问	27.27.109.214(湖北-襄阳)	2	2	1	1	5	3	7	7	7	2	4	2	2	1	7	1	5	5	5	6	5	6	5	6	6	5	5
272	2025/7/9 17:19:59	223秒	微信	N/A	223.104.143.13(吉林-长春)	2	1	2	4	4	1	4	5	6	4	4	5	5	3	3	3	2	6	6	5	6	5	4	4	5	6	6
273	2025/7/9 17:20:07	371秒	微信	N/A	112.102.222.90(黑龙江-哈尔滨)	1	1	2	2	3	1	6	7	5	4	5	4	5	2	2	2	5	6	5	5	6	7	6	6	6	5	7
274	2025/7/9 17:20:33	259秒	手机提交	直接访问	120.40.108.11(福建-福州)	3	2	3	2	3	3	6	7	6	5	6	6	6	2	2	3	6	6	6	7	6	6	5	6	7	5	6
275	2025/7/9 17:20:52	355秒	微信	N/A	42.49.168.89(湖南-郴州)	2	1	4	3	3	2	6	5	7	5	6	6	6	3	2	3	5	6	5	6	5	6	6	6	6	5	5
276	2025/7/9 17:21:19	394秒	微信	N/A	111.25.186.249(吉林-辽源)	2	1	1	1	3	3	3	5	4	4	4	3	4	4	5	5	4	3	4	3	4	5	3	4	3	4	4
277	2025/7/9 17:21:29	273秒	手机提交	直接访问	113.206.218.23(重庆-重庆)	1	1	3	3	4	2	5	4	6	2	3	2	2	7	1	7	6	6	5	3	3	4	3	5	5	5	5
278	2025/7/9 17:22:03	498秒	微信	N/A	115.223.154.225(浙江-温州)	1	1	5	1	4	2	5	5	5	4	3	4	3	4	3	4	5	5	5	4	5	5	6	3	4	3	4
279	2025/7/9 17:22:17	287秒	微信	N/A	122.138.42.147(吉林-松原)	2	1	3	3	3	1	5	4	4	4	5	5	4	4	4	4	5	5	5	5	5	5	5	4	4	3	5
280	2025/7/9 17:22:26	454秒	微信	N/A	120.227.40.216(湖南-长沙)	1	1	3	2	4	2	5	6	6	5	4	4	5	4	3	3	4	3	4	4	5	4	5	5	5	6	5
281	2025/7/9 17:22:48	375秒	微信	N/A	111.121.83.204(贵州-贵阳)	3	1	3	2	4	4	6	5	5	4	4	4	3	2	3	3	5	4	5	6	6	5	5	4	4	3	4
282	2025/7/9 17:23:11	475秒	手机提交	直接访问	111.14.66.87(山东-聊城)	2	2	4	3	5	2	4	5	5	5	3	4	4	5	6	6	5	5	4	4	4	4	4	5	4	4	5
283	2025/7/9 17:23:13	237秒	微信	N/A	115.62.95.124(河南-新乡)	1	2	3	4	4	4	5	4	5	2	3	3	3	5	4	5	3	2	3	2	3	4	2	5	4	4	5
284	2025/7/9 17:23:33	388秒	微信	N/A	123.52.160.17(河南-洛阳)	2	2	4	1	4	3	4	5	5	6	6	5	4	4	4	5	4	4	5	4	5	5	5	4	5	5	5
285	2025/7/9 17:23:57	400秒	手机提交	直接访问	144.0.186.11(山东-菏泽)	2	1	4	3	4	2	6	5	6	4	5	5	5	4	4	4	3	4	4	6	4	6	5	4	4	5	4
286	2025/7/9 17:24:07	415秒	手机提交	直接访问	1.182.125.118(内蒙古-赤峰)	3	1	1	1	5	4	4	3	4	4	4	4	5	3	3	2	5	5	6	4	4	4	3	6	5	5	5
287	2025/7/9 17:24:18	247秒	微信	N/A	60.200.32.253(江西-南昌)	1	1	2	2	3	4	5	4	4	4	5	5	5	4	4	5	5	6	5	4	4	3	5	4	4	5	5
288	2025/7/9 17:24:53	507秒	微信	N/A	120.226.237.105(湖南-长沙)	1	1	1	1	3	3	6	6	5	5	5	4	5	5	5	4	3	4	4	5	6	6	6	6	6	5	6
289	2025/7/9 17:25:03	307秒	微信	N/A	223.74.204.93(广东-潮州)	2	2	3	4	3	2	4	2	3	2	2	4	4	6	5	6	3	4	4	2	4	3	3	5	3	5	5
290	2025/7/9 17:25:34	383秒	微信	N/A	223.89.140.14(河南-驻马店)	1	1	3	4	4	4	7	6	7	1	2	1	2	6	7	7	5	5	6	6	6	7	7	7	6	6	7
291	2025/7/9 17:25:40	363秒	微信	N/A	101.23.240.87(河北-邯郸)	2	1	3	2	4	3	6	5	5	4	5	6	6	6	5	6	5	4	4	5	6	6	5	4	5	5	5
292	2025/7/9 17:25:48	231秒	手机提交	直接访问	219.156.251.43(河南-平顶山)	1	1	5	2	3	1	4	4	5	4	5	5	5	5	4	5	3	3	2	5	4	4	4	5	5	4	5
293	2025/7/9 17:26:19	300秒	手机提交	直接访问	183.52.21.146(广东-梅州)	2	1	3	2	4	3	3	4	4	4	5	5	4	4	5	4	3	4	4	4	3	4	3	3	4	4	4
294	2025/7/9 17:26:27	426秒	微信	N/A	120.226.94.12(湖南-株洲)	1	1	5	3	3	2	4	4	5	3	4	2	2	3	5	5	5	5	6	5	6	4	5	6	5	6	4
295	2025/7/9 17:26:33	292秒	微信	N/A	111.225.78.43(河北-保定)	1	1	3	3	4	3	6	5	5	6	5	5	5	3	3	2	6	5	5	5	4	4	4	5	5	5	5
296	2025/7/9 17:27:04	226秒	微信	N/A	106.58.96.153(云南-怒江)	1	2	4	4	4	2	4	4	5	4	5	5	5	4	4	5	3	2	2	4	3	3	4	4	3	3	4
297	2025/7/9 17:27:16	409秒	微信	N/A	112.38.40.30(山东-聊城)	1	1	3	3	4	2	5	5	5	4	3	3	4	7	7	7	5	3	5	5	4	5	5	3	4	4	3
298	2025/7/9 17:27:27	438秒	微信	N/A	116.95.236.104(内蒙古-阿拉善)	1	1	3	3	5	2	5	4	5	6	5	6	5	6	4	4	3	4	4	4	5	5	4	2	5	6	6
299	2025/7/9 17:27:49	356秒	微信	N/A	117.181.160.196(广西-贺州)	1	2	3	2	5	2	7	3	5	4	5	5	5	4	5	5	3	4	4	5	6	6	5	3	4	3	5
300	2025/7/9 17:28:02	249秒	微信	N/A	223.150.71.47(湖南-常德)	1	2	4	4	4	2	3	4	5	4	5	5	5	5	6	6	4	4	5	4	4	3	4	3	4	4	4
301	2025/7/9 17:28:38	240秒	手机提交	直接访问	120.219.49.108(河南-洛阳)	4	1	4	3	4	2	4	5	4	4	5	5	5	4	4	4	5	6	5	4	4	4	5	2	4	5	5
302	2025/7/9 17:28:47	228秒	微信	N/A	36.46.71.66(陕西-西安)	2	2	4	1	5	2	4	3	5	5	5	4	6	4	6	5	4	4	3	5	4	5	4	4	4	4	3
303	2025/7/9 17:28:57	466秒	微信	N/A	112.38.205.235(山东-聊城)	1	2	4	2	4	4	5	5	5	5	5	6	4	4	4	4	4	4	5	4	5	4	4	5	5	4	4
304	2025/7/9 17:29:23	246秒	微信	N/A	111.18.32.236(陕西-西安)	1	1	3	3	4	1	3	5	1	6	6	4	6	7	7	6	2	3	3	2	4	3	3	2	2	2	5
305	2025/7/9 17:29:32	321秒	微信	N/A	112.38.205.235(山东-聊城)	4	2	2	3	5	3	5	6	5	5	4	6	5	4	5	4	3	2	3	5	5	6	5	4	4	4	5
306	2025/7/9 17:29:42	386秒	手机提交	直接访问	111.22.243.138(湖南-岳阳)	1	1	3	2	5	1	4	5	4	3	4	4	4	5	5	5	4	3	3	4	5	5	3	3	4	4	4
307	2025/7/9 17:30:09	280秒	微信	N/A	183.202.210.58(山西-晋中)	2	1	3	2	4	2	6	7	6	5	4	5	5	3	5	4	6	6	6	4	5	4	5	6	6	6	5
308	2025/7/9 17:30:55	315秒	手机提交	直接访问	223.101.195.188(辽宁-阜新)	1	1	2	2	4	1	5	5	6	5	7	5	5	6	6	6	5	5	6	5	5	6	5	3	2	2	4
309	2025/7/9 17:31:02	428秒	微信	N/A	36.148.160.123(湖南-娄底)	1	1	3	3	4	2	6	5	5	6	4	4	4	5	5	5	4	4	4	6	5	5	5	6	5	5	5
310	2025/7/9 17:31:12	487秒	微信	N/A	120.216.170.241(河南-鹤壁)	2	1	5	4	5	3	3	3	4	3	2	4	4	5	5	5	3	4	4	5	3	1	4	5	4	5	4
311	2025/7/9 17:31:41	313秒	微信	N/A	218.64.119.143(江西-新余)	2	1	3	3	2	2	5	4	4	5	5	5	5	7	7	6	6	6	6	4	4	4	5	6	2	7	6
312	2025/7/9 17:31:58	458秒	微信	N/A	111.29.107.6(海南-儋州)	2	1	5	2	2	3	5	4	4	4	5	5	5	4	4	4	4	3	4	4	4	5	5	4	5	4	4
313	2025/7/9 17:32:45	359秒	微信	N/A	27.39.200.198(广东-云浮)	1	1	3	4	2	2	4	4	4	5	5	4	5	5	4	5	3	3	3	4	4	4	4	3	3	3	3
314	2025/7/9 17:32:45	438秒	微信	N/A	27.39.200.198(广东-云浮)	1	1	2	1	4	4	3	2	3	4	5	5	5	4	5	5	3	4	4	5	5	5	5	6	5	6	5
315	2025/7/9 17:33:12	386秒	手机提交	直接访问	111.49.126.43(宁夏-中卫)	2	2	2	2	2	3	7	6	6	6	7	6	7	6	5	6	3	3	3	3	3	3	3	3	1	1	2
316	2025/7/9 17:33:30	444秒	手机提交	直接访问	183.216.129.96(江西-上饶)	1	1	1	1	2	2	7	7	2	4	4	4	6	4	4	4	4	4	4	5	5	5	5	5	5	5	5
317	2025/7/9 17:33:36	487秒	手机提交	直接访问	223.100.66.7(辽宁-抚顺)	4	2	4	4	4	4	5	5	5	5	5	4	5	6	5	6	5	5	6	5	4	5	5	4	5	5	5
318	2025/7/9 17:33:57	221秒	手机提交	直接访问	120.227.196.26(湖南-湘潭)	1	1	4	3	4	3	7	7	6	4	4	4	3	6	6	5	5	5	6	5	5	4	5	6	4	6	5
319	2025/7/9 17:34:15	390秒	微信	N/A	180.95.180.2(甘肃-酒泉)	1	2	4	3	4	1	5	7	4	6	6	5	6	6	6	5	5	5	6	5	6	6	6	4	5	5	5
320	2025/7/9 17:34:20	516秒	手机提交	直接访问	113.138.94.37(陕西-渭南)	1	1	3	4	4	3	7	5	7	4	4	4	5	4	4	3	4	4	3	6	5	6	6	5	6	6	6
321	2025/7/9 17:35:04	483秒	微信	N/A	112.98.187.225(黑龙江-鹤岗)	1	2	4	3	2	3	4	4	6	6	3	2	6	4	4	2	4	5	4	4	3	4	4	5	4	5	4
322	2025/7/9 17:35:12	377秒	微信	N/A	112.3.250.29(江苏-南京)	2	1	5	3	4	3	6	6	6	3	2	3	2	4	3	4	5	6	5	5	5	6	5	5	5	6	6
323	2025/7/9 17:35:36	294秒	微信	N/A	112.98.187.225(黑龙江-鹤岗)	3	1	4	3	2	1	4	4	5	4	5	5	5	3	4	4	6	6	5	5	4	5	4	4	6	5	4
324	2025/7/9 17:35:50	444秒	微信	N/A	111.25.91.47(吉林-延边)	1	1	5	3	4	2	3	4	4	5	5	4	5	5	4	5	4	4	4	4	4	3	4	5	5	4	5
325	2025/7/9 17:35:59	490秒	手机提交	直接访问	111.25.144.129(吉林-通化)	2	2	5	3	4	3	6	6	5	4	5	5	5	3	3	4	6	6	5	5	4	6	5	5	4	5	6
326	2025/7/9 17:36:30	261秒	微信	N/A	117.189.16.40(贵州-贵阳)	1	1	2	3	2	4	5	5	5	4	4	5	6	5	5	5	3	4	4	5	5	5	5	5	4	5	5
327	2025/7/9 17:36:34	449秒	手机提交	直接访问	114.86.56.56(上海-上海)	1	2	3	3	4	3	2	2	5	3	3	3	3	5	6	6	3	3	2	6	2	2	2	3	4	3	2
328	2025/7/9 17:36:44	309秒	手机提交	直接访问	121.233.177.98(江苏-扬州)	3	2	1	1	4	4	2	2	3	2	3	2	3	7	7	7	6	4	6	6	6	5	4	5	6	6	6
329	2025/7/9 17:37:16	219秒	微信	N/A	120.229.244.250(广东-揭阳)	2	2	3	3	5	2	2	3	4	3	3	4	3	4	4	4	3	3	2	3	3	3	4	3	3	3	3
330	2025/7/9 17:37:20	248秒	手机提交	直接访问	112.102.37.229(黑龙江-哈尔滨)	1	1	4	2	4	1	4	4	4	6	1	2	2	4	4	4	5	6	5	1	2	6	3	6	5	5	5
331	2025/7/9 17:37:30	262秒	微信	N/A	120.226.238.105(湖南-长沙)	2	2	4	3	2	1	5	5	6	5	5	3	5	3	2	3	4	3	4	4	4	4	3	5	5	6	6
332	2025/7/9 17:38:00	275秒	手机提交	直接访问	116.16.127.44(广东-潮州)	3	1	3	4	4	4	4	4	4	5	5	5	5	5	4	5	4	4	5	5	4	5	4	4	4	3	3
333	2025/7/9 17:38:09	298秒	微信	N/A	120.242.235.76(安徽-安庆)	2	1	3	3	2	4	5	5	4	5	5	5	5	5	5	5	3	4	4	4	3	4	4	4	5	5	5
334	2025/7/9 17:38:54	357秒	微信	N/A	183.165.117.92(安徽-蚌埠)	1	1	4	3	4	3	5	5	5	4	5	5	5	5	5	5	3	4	4	5	5	5	4	5	4	5	5
335	2025/7/9 17:39:00	347秒	微信	N/A	117.177.206.99(四川-宜宾)	2	1	1	1	4	1	4	4	4	5	3	5	5	5	6	7	2	2	3	3	4	3	3	5	3	5	4
336	2025/7/9 17:39:30	367秒	微信	N/A	111.60.48.194(湖北-潜江)	1	1	2	2	4	4	5	5	5	6	6	6	6	3	3	3	6	5	6	5	5	6	5	4	5	4	5
337	2025/7/9 17:39:39	336秒	手机提交	直接访问	120.9.198.141(河北-邯郸)	1	2	3	4	4	3	6	6	7	7	7	6	6	4	3	4	6	6	7	7	6	7	6	7	6	6	6
338	2025/7/9 17:39:45	376秒	微信	N/A	120.208.111.30(山西-太原)	1	2	4	1	5	4	5	5	4	6	4	5	5	4	4	4	6	6	5	5	4	5	4	5	6	5	6
339	2025/7/9 17:40:15	469秒	手机提交	直接访问	59.33.48.142(广东-中山)	2	1	2	2	4	2	6	5	5	7	6	6	2	3	3	3	6	7	7	5	6	5	5	6	6	6	6
340	2025/7/9 17:40:24	483秒	微信	N/A	116.31.14.162(广东-中山)	1	1	4	3	4	4	7	5	6	4	5	5	5	4	4	3	3	4	4	5	5	6	5	5	5	4	5
341	2025/7/9 17:40:31	235秒	手机提交	直接访问	14.216.81.74(广东-东莞)	3	1	3	1	4	4	5	5	4	3	3	3	4	5	5	4	3	3	4	4	3	3	3	4	4	4	5
342	2025/7/9 17:41:03	231秒	微信	N/A	117.150.126.64(湖北-十堰)	1	1	4	3	5	1	5	5	4	2	2	3	4	5	5	5	5	4	3	3	3	3	2	4	5	4	5
343	2025/7/9 17:41:09	515秒	微信	N/A	220.202.217.1(湖南-长沙)	2	1	5	3	4	1	4	3	4	4	5	5	5	4	4	4	3	4	4	5	4	4	4	4	4	4	3
344	2025/7/9 17:41:15	238秒	微信	N/A	106.114.152.28(河北-石家庄)	4	1	2	2	5	1	5	6	4	4	5	5	5	5	5	4	3	4	4	5	4	4	3	5	5	4	4
345	2025/7/9 17:41:48	219秒	微信	N/A	111.60.180.176(湖北-荆州)	1	2	2	2	4	4	4	3	6	3	4	3	2	4	4	4	3	4	4	5	5	4	5	4	5	4	4
346	2025/7/9 17:41:56	287秒	微信	N/A	183.198.48.243(河北-保定)	1	1	3	2	5	1	4	5	4	5	5	5	4	2	3	3	6	5	6	5	4	4	4	6	5	6	6
347	2025/7/9 17:42:00	445秒	微信	N/A	223.91.79.49(河南-南阳)	3	1	3	4	4	2	5	5	5	4	6	5	5	5	4	5	5	5	5	5	4	4	4	5	5	4	5
348	2025/7/9 17:42:34	224秒	微信	N/A	112.45.204.153(四川-泸州)	1	1	3	3	4	2	4	4	5	2	1	1	1	2	1	1	3	3	2	5	4	4	4	7	6	7	7
349	2025/7/9 17:42:44	314秒	微信	N/A	223.74.186.49(广东-东莞)	3	1	4	3	4	3	4	2	4	4	3	3	4	5	5	5	3	3	4	3	3	4	4	4	4	6	5
350	2025/7/9 17:42:56	240秒	手机提交	直接访问	139.215.87.202(吉林-长春)	1	2	4	3	4	2	4	5	6	4	4	6	4	4	2	3	5	4	5	6	6	5	4	4	5	5	5
351	2025/7/9 17:43:19	417秒	手机提交	直接访问	39.191.212.106(浙江-丽水)	2	2	2	3	4	2	4	3	4	3	4	3	3	5	5	5	4	2	4	3	3	3	4	3	4	3	3
352	2025/7/9 17:43:29	421秒	手机提交	直接访问	183.200.222.225(山西-忻州)	4	2	5	2	4	2	4	4	5	4	3	4	4	4	4	4	3	4	3	5	4	4	4	3	4	4	3
353	2025/7/9 17:43:55	516秒	手机提交	直接访问	223.89.126.80(河南-三门峡)	1	1	2	1	4	2	5	5	5	4	4	5	4	4	4	4	4	3	3	3	3	4	4	5	5	5	4
354	2025/7/9 17:44:05	293秒	微信	N/A	112.18.126.124(四川-遂宁)	3	2	4	4	2	4	4	5	3	4	5	5	5	6	5	6	5	4	5	3	5	4	4	5	5	3	5
355	2025/7/9 17:44:16	355秒	微信	N/A	111.58.224.221(广西-崇左)	3	2	4	4	2	3	5	4	5	4	3	4	2	5	6	5	6	5	6	4	4	3	4	4	5	4	4
356	2025/7/9 17:44:40	222秒	手机提交	直接访问	121.60.25.16(湖北-武汉)	4	2	5	4	4	1	5	5	4	6	2	1	4	6	5	5	4	3	4	5	4	5	5	5	5	6	4
357	2025/7/9 17:44:50	412秒	微信	N/A	120.208.50.14(山西-运城)	1	1	1	1	4	2	5	5	4	4	5	5	5	7	7	7	4	2	3	4	5	4	5	3	4	3	3
358	2025/7/9 17:45:00	283秒	手机提交	直接访问	180.164.96.116(上海-上海)	2	1	3	2	2	2	5	4	5	4	3	4	4	4	5	5	6	2	2	4	4	3	4	5	4	4	4
359	2025/7/9 17:45:25	400秒	微信	N/A	223.68.97.93(江苏-镇江)	1	1	3	3	4	4	4	6	4	4	5	4	5	3	4	3	5	5	5	4	6	6	4	4	4	4	5
360	2025/7/9 17:45:37	375秒	手机提交	直接访问	117.152.102.89(湖北-仙桃)	3	1	4	1	5	4	5	4	5	4	3	3	4	5	4	5	5	5	5	4	3	3	4	5	4	5	5
361	2025/7/9 17:46:11	255秒	手机提交	直接访问	183.220.212.113(四川-阿坝)	3	2	3	2	4	3	3	2	3	4	4	5	5	4	2	2	3	4	4	5	6	5	5	5	5	5	6
362	2025/7/9 17:46:21	468秒	微信	N/A	182.35.108.177(山东-泰安)	1	2	2	3	4	4	5	4	6	5	5	5	3	4	5	4	4	2	4	4	6	5	5	4	3	4	2
363	2025/7/9 17:46:57	339秒	微信	N/A	183.197.17.247(河北-石家庄)	3	1	3	3	4	2	4	4	4	4	5	5	5	4	5	5	3	4	4	3	4	5	4	6	5	5	5
364	2025/7/9 17:47:10	454秒	微信	N/A	39.179.132.101(江西-新余)	1	1	5	2	4	2	4	5	5	5	5	5	5	6	6	6	5	5	4	6	6	4	4	4	4	4	4
365	2025/7/9 17:47:15	307秒	微信	N/A	117.183.145.102(广西-崇左)	3	1	4	1	4	4	5	5	4	5	5	5	5	4	4	4	6	5	6	4	6	6	4	4	5	5	5
366	2025/7/9 17:47:45	421秒	微信	N/A	116.115.217.218(内蒙古-鄂尔多斯)	3	1	5	4	4	1	4	4	4	1	4	5	5	7	1	7	3	5	3	5	4	4	4	5	4	5	5
367	2025/7/9 17:47:54	347秒	微信	N/A	183.189.73.154(山西-大同)	1	2	3	4	4	2	6	5	5	4	1	4	4	6	6	6	4	5	5	4	5	6	4	5	4	4	5
368	2025/7/9 17:48:00	516秒	微信	N/A	119.120.245.118(广东-潮州)	2	1	4	2	5	4	3	4	3	3	3	4	3	4	5	4	3	3	2	3	4	3	3	4	3	6	6
369	2025/7/9 17:48:39	495秒	微信	N/A	183.197.246.128(河北-石家庄)	2	2	3	2	5	4	5	6	5	5	5	4	4	4	4	4	3	4	4	5	6	6	5	5	5	5	5
370	2025/7/9 17:48:45	339秒	手机提交	直接访问	182.240.13.170(云南-丽江)	2	1	3	3	4	2	4	5	5	5	5	4	5	2	2	4	6	6	5	4	5	4	5	5	6	6	5
371	2025/7/9 17:49:14	290秒	手机提交	直接访问	183.219.226.62(江西-抚州)	1	1	2	2	4	4	5	4	4	4	4	3	4	4	3	4	3	4	4	4	3	4	4	4	4	5	4
372	2025/7/9 17:49:31	237秒	微信	N/A	36.148.43.32(湖南-常德)	2	1	3	2	4	2	4	3	4	5	4	6	5	3	3	4	5	6	5	3	4	4	4	3	4	5	6
373	2025/7/9 17:50:02	479秒	微信	N/A	120.239.20.200(广东-汕头)	1	1	4	3	5	2	5	5	6	6	4	5	5	4	4	4	5	6	6	6	6	5	6	5	5	5	5
374	2025/7/9 17:50:16	312秒	微信	N/A	140.75.230.127(山东-烟台)	1	1	2	1	4	2	4	4	3	1	4	5	3	1	7	7	5	5	5	4	3	3	3	4	4	4	3
375	2025/7/9 17:50:17	404秒	微信	N/A	144.52.155.201(山东-临沂)	1	1	4	1	5	4	5	6	5	4	4	5	4	4	3	3	3	4	1	6	5	5	5	6	6	5	5
376	2025/7/9 17:51:01	230秒	手机提交	直接访问	222.219.181.185(云南-楚雄)	2	1	5	4	5	3	5	6	6	6	6	6	5	5	5	5	5	3	5	5	6	6	6	5	4	4	5
377	2025/7/9 17:51:03	234秒	微信	N/A	110.180.14.157(山西-阳泉)	2	2	3	2	4	4	4	5	6	6	7	5	5	2	1	2	6	6	7	6	4	5	5	5	5	5	5
378	2025/7/9 17:51:49	328秒	微信	N/A	222.248.241.191(广东-深圳)	2	2	2	2	5	3	6	5	6	4	5	4	4	4	4	4	4	4	3	5	6	5	5	5	5	5	5
379	2025/7/9 17:51:50	241秒	微信	N/A	117.189.25.130(贵州-贵阳)	3	1	3	3	4	3	4	3	4	3	3	3	1	4	4	4	3	5	2	3	4	4	4	3	3	3	4
380	2025/7/9 17:52:16	463秒	手机提交	直接访问	183.211.144.11(江苏-无锡)	1	1	3	2	5	3	6	3	3	4	3	3	3	6	7	7	4	5	5	2	1	5	5	4	4	4	3
381	2025/7/9 17:52:35	462秒	手机提交	直接访问	120.229.70.132(广东-深圳)	1	1	2	1	5	1	4	4	3	6	4	4	4	2	3	2	3	4	4	3	5	5	4	6	5	2	5
382	2025/7/9 17:52:40	462秒	微信	N/A	112.44.23.155(四川-眉山)	1	1	5	2	4	4	4	4	3	3	4	2	2	5	4	5	4	4	3	1	5	1	4	3	6	1	2
383	2025/7/9 17:53:00	232秒	微信	N/A	61.54.20.55(河南-洛阳)	1	2	3	3	4	2	5	5	5	5	4	5	5	5	5	5	3	4	4	3	5	5	3	5	4	4	5
384	2025/7/9 17:53:21	322秒	微信	N/A	180.233.71.37(福建-厦门)	2	1	3	4	4	3	7	6	7	5	6	5	5	2	2	2	5	5	5	6	5	7	6	4	4	4	4
385	2025/7/9 17:53:27	278秒	微信	N/A	111.25.130.203(吉林-四平)	2	1	1	1	5	4	4	5	5	4	4	4	4	5	5	5	3	3	2	5	6	4	5	4	4	3	5
386	2025/7/9 17:53:45	364秒	手机提交	直接访问	113.246.235.160(湖南-长沙)	4	1	4	2	5	3	5	6	5	4	5	5	5	7	7	6	5	4	5	1	7	7	6	4	4	5	4
387	2025/7/9 17:54:10	264秒	微信	N/A	111.25.130.203(吉林-四平)	1	2	3	2	4	2	4	5	5	4	5	5	5	5	5	5	3	4	4	4	5	4	6	5	4	4	4
388	2025/7/9 17:54:14	301秒	微信	N/A	218.12.31.16(河北-石家庄)	1	2	4	4	4	2	6	6	7	5	5	5	6	2	4	4	3	4	4	4	4	5	6	4	4	4	3
389	2025/7/9 17:54:39	409秒	微信	N/A	117.189.132.18(贵州-铜仁)	3	2	4	3	5	4	2	4	4	3	3	4	4	4	5	5	5	4	5	3	4	3	4	4	4	4	5
390	2025/7/9 17:54:55	507秒	手机提交	直接访问	111.16.43.28(山东-临沂)	2	1	4	1	4	1	5	5	5	5	5	5	5	4	5	5	4	6	5	5	5	5	5	6	4	5	5
391	2025/7/9 17:55:24	495秒	微信	N/A	223.79.119.97(山东-青岛)	1	2	3	1	5	2	3	4	3	4	3	5	4	5	5	4	3	4	4	5	5	5	5	3	4	4	3
392	2025/7/9 17:55:40	294秒	微信	N/A	124.167.76.82(山西-朔州)	3	2	5	4	4	1	5	4	5	4	4	5	5	5	5	5	4	3	3	5	5	5	6	4	5	3	4
393	2025/7/9 17:55:55	346秒	微信	N/A	112.18.214.107(四川-德阳)	1	1	3	3	5	2	6	5	6	5	6	6	5	4	3	3	5	6	5	5	5	6	5	6	5	5	5
394	2025/7/9 17:56:25	316秒	手机提交	直接访问	58.23.121.123(福建-漳州)	1	1	3	4	4	4	5	4	5	4	5	4	5	4	4	4	5	5	4	4	4	5	5	6	2	5	2
395	2025/7/9 17:57:26	284秒	微信	N/A	39.128.43.233(云南-曲靖)	2	1	5	3	5	3	6	7	7	7	7	7	6	4	4	4	5	5	6	7	7	7	6	3	7	7	7
396	2025/7/9 17:57:40	366秒	微信	N/A	39.76.70.228(山东-临沂)	1	1	3	2	5	4	3	3	3	3	4	4	3	5	6	4	1	6	2	3	4	3	4	4	2	2	3
397	2025/7/9 17:57:54	326秒	手机提交	直接访问	115.198.243.156(浙江-杭州)	1	1	3	1	5	3	6	5	6	3	4	4	4	5	6	5	5	5	6	4	3	4	4	5	6	5	5
398	2025/7/9 17:58:10	347秒	手机提交	直接访问	117.189.213.60(贵州-六盘水)	1	1	3	2	4	2	4	6	6	4	4	4	6	4	3	4	3	3	3	5	6	5	6	3	3	4	2
399	2025/7/9 17:58:26	429秒	微信	N/A	117.140.61.168(广西-南宁)	2	1	3	1	4	4	7	7	6	6	5	6	4	2	2	4	6	2	7	5	6	6	6	6	7	6	2
400	2025/7/9 17:58:55	454秒	微信	N/A	222.91.184.80(陕西-西安)	3	2	3	3	5	2	4	5	5	3	3	4	3	3	4	4	5	4	5	5	5	5	6	5	5	4	4
401	2025/7/9 17:59:11	354秒	微信	N/A	125.78.51.110(福建-泉州)	3	1	3	3	4	3	6	5	6	4	5	5	5	3	3	3	3	4	4	5	5	6	5	5	5	6	6
402	2025/7/9 17:59:35	512秒	微信	N/A	182.35.231.235(山东-日照)	3	1	3	3	4	2	7	6	6	4	5	5	5	4	5	4	5	5	6	6	5	5	6	5	6	5	6
403	2025/7/9 17:59:43	499秒	微信	N/A	111.25.0.123(吉林-长春)	1	1	4	2	5	4	4	4	4	4	5	5	5	4	4	4	4	5	5	4	5	5	5	4	4	4	4
404	2025/7/9 17:59:56	400秒	手机提交	直接访问	118.73.119.226(山西-临汾)	2	1	2	3	5	1	6	5	5	4	4	4	5	3	4	4	5	6	5	6	5	5	5	5	5	4	5
405	2025/7/9 18:00:20	415秒	手机提交	直接访问	117.140.114.32(广西-梧州)	1	2	2	2	4	3	5	5	5	5	5	6	6	4	4	4	5	5	5	5	5	5	5	5	5	5	6
406	2025/7/9 18:00:41	285秒	微信	N/A	183.213.140.36(江苏-常州)	3	1	3	2	4	4	5	4	4	5	3	4	5	6	6	6	4	3	4	4	4	5	4	6	5	6	4
407	2025/7/9 18:01:05	342秒	手机提交	直接访问	223.198.120.69(海南-海口)	2	1	2	1	5	2	5	5	6	4	5	5	5	4	4	3	3	4	4	5	5	5	4	5	5	5	5
408	2025/7/9 18:01:26	517秒	微信	N/A	111.29.217.150(海南-东方)	1	2	4	4	4	2	6	6	5	5	5	6	6	5	5	4	6	6	6	6	5	6	5	5	5	5	5
409	2025/7/9 18:01:50	218秒	微信	N/A	120.239.32.119(广东-茂名)	2	2	4	3	2	1	5	5	5	4	5	5	5	4	4	3	3	3	3	5	4	4	4	5	4	3	4
410	2025/7/9 18:01:57	245秒	微信	N/A	171.42.158.136(湖北-天门)	1	2	3	3	4	2	5	6	7	6	5	5	6	2	5	4	3	3	4	6	6	5	5	3	3	3	4
411	2025/7/9 18:02:11	421秒	微信	N/A	183.225.246.15(云南-西双版纳)	1	2	2	3	5	2	5	4	5	5	5	4	5	4	4	6	4	4	5	4	5	5	6	4	4	5	4
412	2025/7/9 18:02:36	388秒	手机提交	直接访问	223.74.46.218(广东-潮州)	1	2	2	3	4	4	6	6	6	4	5	5	5	4	5	4	3	4	4	7	6	6	6	5	6	6	6
413	2025/7/9 18:02:43	425秒	微信	N/A	111.14.63.230(山东-枣庄)	2	1	3	1	5	4	4	5	5	4	3	4	2	5	5	4	2	3	3	4	4	4	3	5	4	4	4
414	2025/7/9 18:02:57	470秒	手机提交	直接访问	117.93.170.52(江苏-盐城)	1	1	2	1	5	2	5	6	6	2	4	3	3	5	3	3	5	4	4	5	5	4	5	5	5	5	5
415	2025/7/9 18:03:21	432秒	微信	N/A	39.190.110.89(浙江-台州)	1	1	2	1	4	4	3	3	2	5	5	5	5	7	7	7	3	3	2	3	2	2	2	3	3	3	3
416	2025/7/9 18:03:30	351秒	微信	N/A	39.82.106.236(山东-济南)	3	1	1	1	2	2	6	4	4	4	5	5	5	3	3	4	3	4	4	5	5	4	4	5	6	5	5
417	2025/7/9 18:03:42	306秒	微信	N/A	183.192.234.62(上海-上海)	1	1	3	1	5	2	2	2	1	6	7	7	7	7	6	7	2	1	1	2	1	1	1	6	7	7	7
418	2025/7/9 18:04:07	510秒	微信	N/A	39.128.58.185(云南-大理)	2	1	2	2	4	2	5	5	5	6	4	5	5	6	4	4	5	5	5	5	5	5	5	5	5	4	4
419	2025/7/9 18:04:16	479秒	微信	N/A	39.171.229.92(浙江-绍兴)	2	1	3	3	5	3	3	3	3	4	5	6	1	4	4	4	3	3	3	5	6	5	6	3	3	3	3
420	2025/7/9 18:04:28	251秒	手机提交	直接访问	39.148.124.141(河南-新乡)	3	2	4	2	4	2	2	3	2	2	3	6	1	7	7	7	3	3	4	2	2	2	3	3	3	4	3
421	2025/7/9 18:04:53	338秒	微信	N/A	111.25.197.85(吉林-松原)	1	2	3	3	4	4	4	4	5	2	1	6	6	6	7	5	4	5	4	3	4	4	5	6	5	6	5
422	2025/7/9 18:05:15	357秒	微信	N/A	123.186.210.248(辽宁-丹东)	2	2	3	3	5	2	5	6	6	3	3	5	5	6	5	5	4	4	3	3	5	5	6	4	5	5	5
423	2025/7/9 18:05:39	346秒	手机提交	直接访问	112.2.192.171(江苏-淮安)	2	2	3	2	5	3	6	6	5	4	5	5	5	4	3	3	5	5	5	5	5	6	5	5	3	5	6
424	2025/7/9 18:05:54	321秒	微信	N/A	223.91.204.78(河南-新乡)	1	2	1	1	5	4	4	5	4	6	6	5	5	3	2	3	5	5	6	6	5	4	4	4	6	6	5
425	2025/7/9 18:05:59	398秒	微信	N/A	183.162.110.206(安徽-六安)	1	1	2	3	4	1	4	5	6	6	6	6	4	4	3	3	5	6	5	4	5	5	5	6	5	5	5
426	2025/7/9 18:06:24	244秒	微信	N/A	121.57.133.220(内蒙古-鄂尔多斯)	1	1	2	3	4	3	5	4	5	5	3	5	5	3	3	4	5	5	5	5	6	5	6	4	4	4	5
427	2025/7/9 18:06:40	343秒	微信	N/A	122.158.139.200(黑龙江-牡丹江)	1	1	3	3	5	2	5	6	5	5	5	4	5	5	5	5	3	4	4	5	6	5	5	5	5	5	5
428	2025/7/9 18:06:44	426秒	链接	直接访问	39.154.141.253(内蒙古-包头)	1	2	3	3	4	3	4	5	5	5	5	4	4	6	6	7	5	7	5	4	4	5	5	2	2	2	2
429	2025/7/9 18:07:08	304秒	手机提交	直接访问	121.230.123.49(江苏-泰州)	1	1	4	2	4	2	6	5	5	4	3	3	3	5	5	5	4	3	3	3	4	3	3	6	5	6	5
430	2025/7/9 18:07:25	295秒	微信	N/A	112.12.162.252(浙江-温州)	3	1	4	2	4	2	3	2	4	4	3	4	3	5	5	5	4	4	3	4	4	3	4	3	5	4	5
431	2025/7/9 18:07:32	367秒	微信	N/A	119.39.212.34(湖南-株洲)	2	1	3	2	5	1	4	3	4	4	5	3	3	7	7	7	4	5	5	4	4	4	3	5	5	4	5
432	2025/7/9 18:07:54	407秒	手机提交	直接访问	220.115.57.147(广东-深圳)	2	2	2	3	5	3	6	5	6	4	5	5	5	4	3	3	4	5	5	6	6	5	5	6	5	5	5
433	2025/7/9 18:08:11	384秒	微信	N/A	120.225.105.150(山东-临沂)	1	1	4	3	5	2	3	3	4	5	6	4	4	6	5	6	3	4	4	6	5	5	6	4	4	3	3
434	2025/7/9 18:08:19	373秒	微信	N/A	223.90.56.22(河南-焦作)	1	2	3	3	5	4	6	6	7	7	7	7	7	2	2	2	6	6	6	6	7	7	6	6	6	6	7
435	2025/7/9 18:08:39	432秒	微信	N/A	223.73.239.44(广东-惠州)	1	1	5	4	4	3	5	5	4	7	6	1	7	5	5	4	3	3	4	5	5	6	5	6	4	6	5
436	2025/7/9 18:08:57	372秒	手机提交	直接访问	59.152.39.184(河南-郑州)	3	1	4	3	4	4	3	3	4	1	6	3	1	5	4	5	4	5	4	4	3	4	3	5	5	4	6
437	2025/7/9 18:09:04	238秒	手机提交	直接访问	1.30.73.75(内蒙古-呼和浩特)	2	1	3	2	4	4	6	5	4	4	4	4	3	3	4	5	4	4	6	4	5	6	4	5	5	4	4
438	2025/7/9 18:09:24	354秒	手机提交	直接访问	123.164.143.99(黑龙江-绥化)	3	1	5	3	4	2	6	5	6	4	5	5	5	5	5	5	5	4	5	5	6	5	5	5	5	4	5
439	2025/7/9 18:09:44	343秒	手机提交	直接访问	111.32.42.184(天津-天津)	3	1	5	2	4	1	5	4	4	6	6	6	4	3	4	3	5	5	4	4	5	4	4	5	5	4	5
440	2025/7/9 18:09:49	263秒	手机提交	直接访问	123.196.11.112(山东-青岛)	4	1	2	3	4	4	7	6	7	6	6	7	7	3	3	3	5	5	5	7	6	6	7	6	6	7	6
441	2025/7/9 18:10:09	296秒	微信	N/A	112.47.77.177(福建-泉州)	3	1	3	1	5	1	2	4	2	2	3	6	2	5	6	6	3	3	4	2	1	6	3	5	4	2	5
442	2025/7/9 18:10:55	258秒	微信	N/A	117.183.195.62(广西-贺州)	3	1	4	2	5	4	4	6	5	4	5	5	5	6	6	5	3	4	4	6	5	4	5	5	5	5	5
443	2025/7/9 18:11:14	373秒	手机提交	直接访问	182.88.227.89(广西-南宁)	1	1	4	3	4	3	4	5	5	5	4	4	4	4	3	4	3	2	3	5	4	5	5	3	3	2	3
444	2025/7/9 18:11:27	422秒	微信	N/A	14.218.37.33(广东-东莞)	1	1	3	4	5	3	5	6	3	5	6	2	6	7	4	3	5	4	5	4	5	5	4	5	5	4	5
445	2025/7/9 18:11:42	512秒	微信	N/A	111.58.84.90(广西-梧州)	2	1	3	3	4	3	5	6	7	2	2	2	2	4	5	5	6	6	6	6	6	6	5	6	6	6	5
446	2025/7/9 18:12:15	300秒	微信	N/A	111.37.189.239(山东-烟台)	2	2	2	2	4	3	3	4	4	4	5	5	5	5	4	5	4	5	5	4	3	4	4	5	5	5	5
447	2025/7/9 18:12:29	330秒	微信	N/A	113.27.26.28(山西-晋城)	1	2	3	2	5	3	1	6	5	4	4	4	3	7	4	3	2	6	2	5	1	6	3	4	5	3	3
448	2025/7/9 18:12:43	399秒	手机提交	直接访问	120.239.10.80(广东-汕头)	3	1	3	3	4	3	4	4	5	3	4	4	5	4	5	4	3	3	3	4	5	6	5	4	4	4	4
449	2025/7/9 18:13:01	347秒	手机提交	直接访问	106.8.217.42(河北-沧州)	1	2	3	1	4	4	5	5	5	3	3	4	3	4	3	4	3	3	2	4	3	3	3	3	4	3	4
450	2025/7/9 18:13:26	431秒	微信	N/A	171.119.240.155(山西-忻州)	1	1	3	3	5	2	5	5	4	4	5	3	5	4	4	4	3	3	3	5	4	4	4	5	3	3	5
451	2025/7/9 18:13:48	468秒	手机提交	直接访问	112.40.119.116(辽宁-鞍山)	2	1	3	2	5	3	4	5	5	4	5	5	5	6	2	5	3	4	4	4	3	4	4	4	4	5	5
452	2025/7/9 18:13:52	316秒	手机提交	直接访问	110.230.132.155(河北-保定)	1	1	4	1	4	2	7	7	7	7	7	7	7	3	1	5	6	6	6	6	7	6	7	7	7	7	7
453	2025/7/9 18:14:19	381秒	手机提交	直接访问	120.231.190.116(广东-江门)	1	1	2	2	4	2	4	5	4	5	4	4	3	5	6	5	3	2	3	3	3	3	3	4	4	4	4
454	2025/7/9 18:14:40	333秒	微信	N/A	183.216.27.63(江西-南昌)	1	2	3	3	5	2	5	5	5	1	3	1	3	3	3	2	6	6	6	5	5	5	6	5	5	6	5
455	2025/7/9 18:14:42	294秒	微信	N/A	183.216.27.63(江西-南昌)	2	1	2	1	5	4	5	5	5	4	6	6	5	6	5	5	3	4	4	4	4	5	5	4	2	2	4
456	2025/7/9 18:15:06	291秒	微信	N/A	112.47.166.119(福建-泉州)	1	2	2	2	4	1	5	6	5	4	5	5	5	4	2	3	5	6	5	5	5	5	4	5	5	4	5
457	2025/7/9 18:15:26	375秒	微信	N/A	14.112.26.104(广东-惠州)	2	1	1	1	4	1	4	4	4	4	5	5	5	5	5	4	4	4	4	3	4	5	4	5	5	5	5
458	2025/7/9 18:15:27	221秒	手机提交	直接访问	117.189.246.32(贵州-黔西南)	2	2	3	2	5	3	5	6	5	6	2	5	6	5	5	5	3	4	4	6	5	5	5	3	4	4	4
459	2025/7/9 18:15:50	382秒	微信	N/A	36.57.104.59(安徽-六安)	1	2	2	3	4	4	5	3	3	1	4	2	5	5	4	5	3	3	4	4	5	4	5	4	3	4	3
460	2025/7/9 18:16:10	315秒	微信	N/A	120.230.80.180(广东-广州)	2	2	1	1	5	2	5	5	4	6	5	6	6	5	5	5	3	3	4	5	4	5	5	3	4	3	3
461	2025/7/9 18:16:36	271秒	微信	N/A	112.45.187.17(四川-凉山)	1	1	3	1	4	3	4	5	4	5	4	5	4	5	5	4	3	4	4	5	3	4	4	5	4	4	4
462	2025/7/9 18:16:56	315秒	微信	N/A	27.224.66.170(甘肃-嘉峪关)	1	2	3	4	5	1	5	5	5	4	4	5	5	6	5	6	4	4	5	4	3	4	5	5	5	4	4
463	2025/7/9 18:17:04	517秒	微信	N/A	117.155.138.166(湖北-咸宁)	3	2	4	1	2	3	4	5	5	4	5	5	5	3	2	4	3	4	4	5	5	5	5	5	5	5	4
